# Supplementary material for: Pyrene-biimidazole based Ru(ii) and Os(ii) complexes as highly efficient probes for the visible and near-infrared detection of cyanide in aqueous media
Source: Royal Society of Chemistry journal article supplement (doi:10.1039/c5dt03766b), 2015-01-01
Supplement: c5dt03766b1.pdf [file c5dt03766b1.pdf]

## **Electronic supplementary information**

### **Pyrene-biimidazole based Ru(II) and Os(II) complexes as highly efficient probes for visible and near-infrared detection of cyanide in aqueous medium**

**Sourav Mardanya, Srikanta Karmakar, Manoranjan Bar and Sujoy Baitalik\***

Department of Chemistry, Inorganic Chemistry Section, Jadavpur University, Kolkata –  
700032, India

## Physical measurements

Elemental analyses of the compounds were performed with a Vario-Micro V2.0.11 elemental (CHNSO) analyzer. NMR spectra were collected on either a Bruker 300 or Bruker 500 spectrometer in DMSO-*d*<sub>6</sub>, and high resolution mass spectroscopy was performed on a Waters Xevo G2 QTOF mass spectrometer. The UV/vis absorption spectra were recorded with a Shimadzu UV 1800 spectrometer. A matched pair of quartz cuvettes (path length 1 cm) was employed. Steady state luminescence spectra were obtained either by a Perkin–Elmer LS55 or Spex fluorolog-2 spectrofluorometer equipped with DM3000F software. Luminescence quantum yields were determined by using literature method taking [Ru(bpy)<sub>3</sub>]<sup>2+</sup> as the standard. The quantum yields were calculated by using eq S1.

$$\Phi_r = \Phi_{\text{std}} \cdot A_{\text{std}}/A_r \cdot I_r/I_{\text{std}} \cdot \eta_r^2/\eta_{\text{std}}^2 \quad (\text{S1})$$

where  $\Phi_r$  and  $\Phi_{\text{std}}$  are the quantum yields of unknown and standard samples [ $\Phi_{\text{std}}=0.089$  (at 298 K) and 0.35 (at 77 K) in ethanol-methanol (4:1) at  $\lambda_{\text{ex}}=450$  nm],  $A_r$  and  $A_{\text{std}}$  (<0.1) are the solution absorbances at the excitation wavelength ( $\lambda_{\text{ex}}$ ),  $I_r$  and  $I_{\text{std}}$  are the integrated emission intensities, and  $\eta_r$  and  $\eta_{\text{std}}$  are the refractive indices of the solvent.<sup>S1</sup>

Luminescence lifetime measurements were carried out by using time–correlated single photon counting set up from Horiba Jobin-Yvon. The luminescence decay data were collected on a Hamamatsu MCP photomultiplier (R3809) and were analyzed by using IBH DAS6 software. Cyclic and square-wave voltammetric experiments were performed in deaerated acetonitrile with a BAS epsilon electrochemistry system and a three-electrode set up consisting of a platinum or glassy carbon working electrode, a platinum counter electrode, and Ag/AgCl reference electrode. Tetraethylammonium perchlorate (TEAP) was used as background electrolyte. The potentials reported in this study were referenced against the Ag/AgCl electrode, which under the given experimental conditions gave a value of 0.36 V for the Fc/Fc<sup>+</sup> couple.

Experimental uncertainties were as follows: absorption maxima  $\pm 2$  nm; molar absorption coefficients, 10%; emission maxima,  $\pm 5$  nm; excited-state lifetimes, 10%; luminescence quantum yields, 20%; redox potentials  $\pm 10$  mV.

## Anion sensing experiments

For a typical absorption and emission titration experiment, aliquots of a TBA salts of F<sup>−</sup>, Cl<sup>−</sup>, Br<sup>−</sup>, I<sup>−</sup> and AcO<sup>−</sup> and H<sub>2</sub>PO<sub>4</sub><sup>−</sup> ( $5.0 \times 10^{-3}$  M) were added incrementally to a 2.5 mL solution of the complexes ( $2.0 \times 10^{-5}$  M). In aqueous medium the experiments were carried out in

HEPES buffer medium (pH=7.00) and the concentration of the metal complexes were taken as  $1.5 \times 10^{-5}$  M for study. The equilibrium constants were evaluated from the absorbance data using equation (S2)<sup>S2</sup>.

$$A_{\text{obs}} = (A_0 + A_{\infty}K[G]_{\text{T}})/(1 + K[G]_{\text{T}}) \quad (\text{S2})$$

where  $A_{\text{obs}}$  is the observed absorbance,  $A_0$  is the absorbance of the free receptor,  $A_{\infty}$  is the maximum absorbance induced by the presence of a given anionic guest,  $[G]_{\text{T}}$  is the total concentration of the guest, and  $K$  is the equilibrium constant of the host–guest entity. Binding constants were performed in duplicate, and the average value is reported. The lifetimes of the receptors were recorded as a function of different anions and solvents.

### **X-ray crystallographic analyses**

The crystallographic data, details of data collection, and refinement parameter for the complexes **1** is summarized in Table S1. Single crystals of suitable size were obtained by diffusing toluene to 1:1 acetonitrile-dichloromethane solution of the complexes. The crystal was immersed in paratone oil and then mounted on the tip of a glass fiber and cemented using epoxy resin. Intensity data for the crystal was collected using MoK $\alpha$  ( $\lambda = 0.7107$  Å) radiation on a Bruker SMART APEX II diffractometer equipped with CCD area detector at room temperature. The data integration and reduction were processed with SAINT<sup>S3</sup> software provided with the software package of SMART APEX II. An empirical absorption correction was applied to the collected reflections with SADABS.<sup>S3</sup> The structure was solved by direct methods using SHELXTL<sup>S4</sup> and was refined on F<sup>2</sup> by the full-matrix least-squares technique using the SHELXL-97<sup>S5</sup> program package. Graphics were generated using PLATON.<sup>S6</sup> Non-hydrogen atoms were refined anisotropically until the convergence. All the hydrogen atoms were geometrically positioned and treated as riding atoms. In the complex **1** the hydrogen atoms of the lattice water molecules could not be located from the difference Fourier map.

CCDC reference numbers is 1409760 for **1**

### **Theoretical computational methods**

Quantum chemical calculations were performed with the Gaussian 09 program<sup>S7</sup> employing the DFT method with Becke's three-parameter hybrid functional and Lee-Yang-Parr's gradient corrected correlation functional B3LYP level of theory.<sup>S8-S9</sup> The 6-31G(d) basis set was employed for the C, H and N while SDD basis set was used for Ru and Os atoms.<sup>S10</sup> Geometries were fully optimized using the criteria of the respective programs. To compute the UV-vis transition of the compounds, the singlet excited state geometries corresponding to

the vertical excitations were optimized using the time-dependent DFT (TDDFT) scheme starting with the ground state geometries optimized in solution phase.<sup>S11-S14</sup> The excitation energies, computed within the acetonitrile solvent simulated by the CPCM model,<sup>S15</sup> has been determined by using the so-called nonequilibrium approach, which has been designed for the study of the absorption process.<sup>S16-S17</sup> Only singlet-singlet transitions, that is, the spin-allowed transitions, have been taken into account. The geometries of the lowest energy triplet states of the complexes were also optimized in CH<sub>3</sub>CN using the CPCM model. Orbital analysis was completed with Gauss View<sup>S18</sup> and Gauss sum 2.2.<sup>S19</sup>

**Table S1** Crystallographic data for **1**

| Compound                                                                                                                                   | <b>1</b>              |
|--------------------------------------------------------------------------------------------------------------------------------------------|-----------------------|
| Formula                                                                                                                                    | C43 H35 N9 Cl2 O10 Ru |
| fw                                                                                                                                         | 1009.77               |
| T (K)                                                                                                                                      | 273(2)                |
| Cryst. Syst.                                                                                                                               | Monoclinic            |
| Space group                                                                                                                                | P2(1)/c               |
| <i>a</i> (Å)                                                                                                                               | 11.4961(4)            |
| <i>b</i> (Å)                                                                                                                               | 30.8004(10)           |
| <i>c</i> (Å)                                                                                                                               | 12.1865(4)            |
| $\alpha$ (deg)                                                                                                                             | 90.00                 |
| $\beta$ (deg)                                                                                                                              | 90.00                 |
| $\gamma$ (deg)                                                                                                                             | 90.00                 |
| <i>V</i> (Å <sup>3</sup> )                                                                                                                 | 4315.1(2)             |
| Dc(g cm <sup>-3</sup> )                                                                                                                    | 1.554                 |
| Z                                                                                                                                          | 4                     |
| $\mu$ (mm <sup>-1</sup> )                                                                                                                  | 0.557                 |
| <i>F</i> (000)                                                                                                                             | 2056.0                |
| $\theta$ range (deg)                                                                                                                       | 2.21-27.50            |
| Data/restraints/params                                                                                                                     | 9382/0/588            |
| GOF on <i>F</i> <sup>2</sup>                                                                                                               | 0.703                 |
| <i>R</i> <sub>1</sub> [ <i>I</i> > 2 $\sigma$ ( <i>I</i> )] <sup>a</sup> ,                                                                 | 0.0590                |
| w <i>R</i> <sub>2</sub> (all data) <sup>b</sup>                                                                                            | 0.1800                |
| $\Delta\rho_{\max}/\Delta\rho_{\min}$ (e Å)                                                                                                | 0.568/ -0.693         |
| <sup>a</sup> $R_1(F) = [\sum   F_0  -  F_C   / \sum  F_0 ]$ , <sup>b</sup> $wR_2(F^2) = [\sum w(F_0^2 - F_C^2)^2 / \sum w(F_0^2)^2]^{1/2}$ |                       |

**Table S2** Selected calculated bond distances (Å) and angles (deg) for **1**, **1a**, **1b** in ground state and triplet excited state along with available X-ray crystal data

|           | <b>1</b>   |          |           |           | Triplet( <b>1</b> ) | Triplet (1a) | Triplet(1b) |
|-----------|------------|----------|-----------|-----------|---------------------|--------------|-------------|
|           | Exptl.     | Soln.(1) | Soln.(1a) | Soln.(1b) |                     |              |             |
| Ru1-N1    | 2.075(4)   | 2.102    | 2.094     | 2.083     | 2.099               | 2.012        | 2.068       |
| Ru1-N3    | 2.187(4)   | 2.264    | 2.259     | 2.200     | 2.268               | 2.251        | 2.226       |
| Ru1-N5    | 2.057(5)   | 2.100    | 2.106     | 2.110     | 2.100               | 2.144        | 2.096       |
| Ru1-N6    | 2.057(4)   | 2.103    | 2.100     | 2.095     | 2.104               | 2.142        | 2.098       |
| Ru1-N7    | 2.030(4)   | 2.086    | 2.078     | 2.073     | 2.087               | 2.034        | 2.089       |
| Ru1-N8    | 2.008(4)   | 2.067    | 2.064     | 2.077     | 2.066               | 2.072        | 2.078       |
| N1-Ru1-N3 | 76.85(15)  | 76.95    | 77.60     | 77.54     | 76.84               | 78.88        | 77.65       |
| N1-Ru1-N5 | 173.91(17) | 173.52   | 172.33    | 171.27    | 173.63              | 170.66       | 173.00      |
| N1-Ru1-N6 | 97.68(17)  | 96.00    | 94.86     | 94.02     | 96.14               | 95.47        | 96.65       |
| N1-Ru1-N7 | 88.31(17)  | 88.74    | 89.19     | 89.92     | 88.64               | 93.06        | 89.13       |
| N1-Ru1-N8 | 89.54(16)  | 92.25    | 91.90     | 91.98     | 92.27               | 92.20        | 91.08       |
| N3-Ru1-N5 | 107.39(15) | 104.60   | 103.68    | 104.10    | 104.74              | 104.48       | 106.25      |
| N3-Ru1-N6 | 88.12(16)  | 87.25    | 87.13     | 87.53     | 87.12               | 80.03        | 88.54       |
| N3-Ru1-N7 | 96.80(16)  | 96.42    | 96.03     | 95.36     | 96.52               | 96.80        | 95.14       |
| N3-Ru1-N8 | 166.14(16) | 168.30   | 168.36    | 167.88    | 168.26              | 170.44       | 167.57      |
| N5-Ru1-N6 | 78.31(17)  | 77.87    | 77.72     | 77.56     | 77.86               | 76.26        | 77.82       |
| N5-Ru1-N7 | 95.43(17)  | 97.28    | 98.13     | 98.39     | 97.24               | 95.13        | 96.21       |
| N5-Ru1-N8 | 86.38(17)  | 86.62    | 87.38     | 87.17     | 86.55               | 84.84        | 85.49       |
| N6-Ru1-N7 | 173.01(17) | 174.57   | 175.32    | 175.53    | 174.55              | 171.38       | 173.70      |
| N6-Ru1-N8 | 96.39(18)  | 98.53    | 98.88     | 99.04     | 98.55               | 98.45        | 98.08       |
| N7-Ru1-N8 | 79.97(18)  | 78.59    | 78.61     | 78.35     | 78.60               | 80.08        | 79.25       |

**Table S3** Equilibrium constants<sup>a,b</sup> for **1** and **2** towards various anions in acetonitrile and pure aqueous medium at 298 K

| <b>In Acetonitrile Medium</b>               |                            |                            |                            |                            |
|---------------------------------------------|----------------------------|----------------------------|----------------------------|----------------------------|
| From Absorption spectra                     |                            |                            |                            |                            |
|                                             | <b>1</b>                   |                            | <b>2</b>                   |                            |
| anion                                       | $K_1(10^6 \text{ M}^{-1})$ | $K_2(10^6 \text{ M}^{-1})$ | $K_1(10^6 \text{ M}^{-1})$ | $K_2(10^6 \text{ M}^{-1})$ |
| F <sup>-</sup>                              | 4.36                       | 2.63                       | 3.52                       | 2.98                       |
| CN <sup>-</sup>                             | 3.60                       | 2.33                       | 3.07                       | 2.79                       |
| AcO <sup>-</sup>                            | 3.01                       | 2.31                       | 2.82                       | 2.30                       |
| H <sub>2</sub> PO <sub>4</sub> <sup>-</sup> | 2.33                       | ----                       | 1.89                       | ---                        |
| From Emission spectra                       |                            |                            |                            |                            |
|                                             | <b>1</b>                   |                            | <b>2</b>                   |                            |
| anion                                       | $K_1(10^6 \text{ M}^{-1})$ | $K_2(10^6 \text{ M}^{-1})$ | $K_1(10^6 \text{ M}^{-1})$ | $K_2(10^6 \text{ M}^{-1})$ |
| F <sup>-</sup>                              | 3.76                       | 3.33                       | 3.39                       | 2.14                       |
| CN <sup>-</sup>                             | 3.62                       | 2.80                       | 3.06                       | 1.83                       |
| AcO <sup>-</sup>                            | 3.16                       | 2.68                       | 2.59                       | 1.68                       |
| H <sub>2</sub> PO <sub>4</sub> <sup>-</sup> | 3.02                       | ----                       | 2.89                       | ---                        |
| <b>In Aqueous Medium</b>                    |                            |                            |                            |                            |
| From Absorption spectra                     |                            |                            |                            |                            |
|                                             | <b>1</b>                   |                            | <b>2</b>                   |                            |
| anion                                       | $K_1(10^5 \text{ M}^{-1})$ | $K_2(10^4 \text{ M}^{-1})$ | $K_1(10^5 \text{ M}^{-1})$ | $K_2(10^4 \text{ M}^{-1})$ |
| CN <sup>-</sup>                             | 3.45                       | 1.34                       | 6.77                       | 1.07                       |
| From Emission Spectra                       |                            |                            |                            |                            |
|                                             | <b>1</b>                   |                            | <b>2</b>                   |                            |
| anion                                       | $K_1(10^5 \text{ M}^{-1})$ | $K_2(10^4 \text{ M}^{-1})$ | $K_1(10^5 \text{ M}^{-1})$ | $K_2(10^4 \text{ M}^{-1})$ |
| CN <sup>-</sup>                             | 2.03                       | 1.03                       | 3.20                       | 1.37                       |

**Table S4** Selected calculated bond distances (Å) and angles (deg) for **2**, **2a**, **2b** in ground state and triplet excited state

|           | <b>2 (sol)</b> |           |           | <b>2 (triplet)</b> |              |             |
|-----------|----------------|-----------|-----------|--------------------|--------------|-------------|
|           | Soln.(2)       | Soln.(2a) | Soln.(2b) | Triplet( 2)        | Triplet (2a) | Triplet(2b) |
| Os1-N1    | 2.107          | 2.105     | 2.097     | 2.078              | 2.035        | 2.019       |
| Os1-N3    | 2.249          | 2.248     | 2.198     | 2.243              | 2.244        | 2.197       |
| Os1-N5    | 2.102          | 2.104     | 2.103     | 2.115              | 2.137        | 2.134       |
| Os1-N6    | 2.106          | 2.101     | 2.095     | 2.137              | 2.138        | 2.128       |
| Os1-N7    | 2.093          | 2.082     | 2.076     | 2.051              | 2.051        | 2.062       |
| Os1-N8    | 2.074          | 2.069     | 2.079     | 2.076              | 2.088        | 2.104       |
| <hr/>     |                |           |           |                    |              |             |
| N1-Os1-N3 | 76.18          | 76.71     | 76.66     | 76.87              | 77.86        | 77.98       |
| N1-Os1-N5 | 173.07         | 171.96    | 170.89    | 172.14             | 170.42       | 170.45      |
| N1-Os1-N6 | 96.15          | 94.99     | 94.07     | 97.03              | 95.59        | 95.50       |
| N1-Os1-N7 | 88.54          | 88.86     | 89.56     | 89.39              | 92.62        | 92.36       |
| N1-Os1-N8 | 93.12          | 92.77     | 92.70     | 93.09              | 92.76        | 92.84       |
| N3-Os1-N5 | 105.24         | 104.26    | 104.53    | 106.74             | 105.74       | 105.45      |
| N3-Os1-N6 | 86.70          | 86.54     | 86.99     | 85.05              | 85.45        | 85.59       |
| N3-Os1-N7 | 96.90          | 96.41     | 95.45     | 97.29              | 97.13        | 96.83       |
| N3-Os1-N8 | 168.31         | 168.26    | 167.52    | 169.54             | 169.87       | 169.77      |
| N5-Os1-N6 | 77.25          | 77.16     | 77.05     | 76.56              | 76.06        | 76.07       |
| N5-Os1-N7 | 97.95          | 98.91     | 99.24     | 96.95              | 95.67        | 96.00       |
| N5-Os1-N8 | 85.93          | 86.88     | 87.00     | 83.57              | 84.11        | 84.33       |
| N6-Os1-N7 | 174.66         | 175.60    | 176.00    | 173.51             | 171.73       | 172.08      |
| N6-Os1-N8 | 99.28          | 99.72     | 100.43    | 99.28              | 99.44        | 99.93       |
| N7-Os1-N8 | 77.87          | 77.93     | 77.72     | 79.42              | 79.27        | 78.85       |

**Table S5** Selected molecular orbital along with their energies and compositions for **1**, **1a**, **1b** and **2**, **2a** and **2b** in triplet excited state (using 6-31G(d) and SDD basis sets)

| Energy/ eV |          |           |           | (% ) Composition         |                 |       |       |                           |                 |       |       |                           |                 |       |       |
|------------|----------|-----------|-----------|--------------------------|-----------------|-------|-------|---------------------------|-----------------|-------|-------|---------------------------|-----------------|-------|-------|
| MO         | <b>1</b> | <b>1a</b> | <b>1b</b> | <b>1</b> (%) Composition |                 |       |       | <b>1a</b> (%) Composition |                 |       |       | <b>1b</b> (%) Composition |                 |       |       |
|            |          |           |           | Ru <sup>II</sup>         | pyrene<br>imida | imida | bpy   | Ru <sup>II</sup>          | pyrene<br>imida | imida | bpy   | Ru <sup>II</sup>          | pyrene<br>imida | imida | bpy   |
| LUMO+3     | -1.95    | -1.47     | -1.16     | 3.87                     | 62.23           | 31.63 | 2.25  | 2.64                      | 1.07            | 0.27  | 96.00 | 1.70                      | 79.97           | 0.05  | 18.26 |
| LUMO+2     | -2.18    | -1.64     | -1.34     | 0.48                     | 91.23           | 7.72  | 0.55  | 0.61                      | 97.83           | 0.46  | 1.07  | 2.90                      | 1.48            | 0.16  | 95.45 |
| LUMO+1     | -2.46    | -2.27     | -2.15     | 6.04                     | 0.38            | 0.05  | 93.50 | 4.83                      | 0.44            | 0.09  | 94.63 | 6.75                      | 0.54            | 0.08  | 92.61 |
| LUMO       | -2.52    | -2.62     | -2.5      | 3.10                     | 0.44            | 0.53  | 95.91 | 7.15                      | 0.10            | 0.45  | 92.29 | 5.70                      | 0.07            | 0.30  | 93.91 |
| HOMO       | -5.43    | -5.05     | -4.12     | 4.38                     | 88.79           | 6.22  | 0.58  | 26.62                     | 38.23           | 29.95 | 5.17  | 3.44                      | 59.85           | 36.14 | 0.55  |
| HOMO-1     | -5.92    | -5.42     | -5.17     | 75.38                    | 9.67            | 4.40  | 10.53 | 43.27                     | 32.04           | 15.96 | 8.72  | 62.08                     | 13.58           | 14.47 | 9.85  |
| HOMO-2     | -6.11    | -5.76     | -5.3      | 75.22                    | 9.09            | 1.65  | 14.02 | 74.56                     | 2.73            | 5.12  | 17.57 | 59.06                     | 30.72           | 2.81  | 7.39  |
| HOMO-3     | -6.17    | -5.78     | -5.43     | 76.77                    | 2.70            | 3.55  | 16.96 | 71.04                     | 19.08           | 0.23  | 9.63  | 48.82                     | 26.26           | 10.49 | 14.41 |
|            |          |           |           | <b>2</b> (%) Composition |                 |       |       | <b>2a</b> (%) Composition |                 |       |       | <b>2b</b> (%) Composition |                 |       |       |
| MO         | <b>2</b> | <b>2a</b> | <b>2b</b> | Os <sup>II</sup>         | pyrene<br>imida | imida | bpy   | Os <sup>II</sup>          | pyrene<br>imida | imida | bpy   | Os <sup>II</sup>          | pyrene<br>imida | imida | bpy   |
|            |          |           |           |                          |                 |       |       |                           |                 |       |       |                           |                 |       |       |
| LUMO+3     | -1.79    | -1.47     | -1.2      | 2.00                     | 92.85           | 4.38  | 0.75  | 2.66                      | 0.76            | 0.16  | 96.40 | 0.99                      | 95.81           | 0.05  | 3.14  |
| LUMO+2     | -2.05    | -1.66     | -1.31     | 3.53                     | 59.59           | 34.09 | 2.77  | 0.61                      | 97.80           | 0.52  | 1.05  | 2.88                      | 1.03            | 0.17  | 95.90 |
| LUMO+1     | -2.46    | -2.27     | -2.1      | 6.73                     | 0.77            | 0.29  | 92.19 | 7.69                      | 0.58            | 0.14  | 91.57 | 8.63                      | 0.56            | 0.16  | 90.63 |
| LUMO       | -2.82    | -2.6      | -2.42     | 7.04                     | 0.68            | 1.03  | 91.23 | 8.66                      | 0.29            | 0.88  | 90.15 | 9.56                      | 0.25            | 1.01  | 89.16 |
| HOMO       | -5.47    | -4.95     | -4.35     | 55.50                    | 25.47           | 7.84  | 11.16 | 48.94                     | 17.17           | 21.71 | 12.17 | 17.17                     | 49.04           | 28.89 | 4.88  |
| HOMO-1     | -5.78    | -5.33     | -4.82     | 24.44                    | 64.56           | 5.46  | 5.52  | 28.35                     | 45.43           | 19.24 | 6.96  | 49.21                     | 22.30           | 15.43 | 13.03 |
| HOMO-2     | -5.9     | -5.56     | -5.09     | 73.07                    | 10.83           | 1.23  | 14.85 | 74.80                     | 5.31            | 4.39  | 15.49 | 62.22                     | 25.95           | 2.50  | 9.31  |
| HOMO-3     | -5.98    | -5.6      | -5.25     | 68.05                    | 5.81            | 3.66  | 22.46 | 59.51                     | 20.17           | 1.94  | 18.36 | 64.26                     | 6.03            | 5.81  | 23.88 |



**Table S6** Phosphorescence emissions of **1**, **1a**, **1b** and **2**, **2a** and **2b** in acetonitrile solution according to TD-DFT calculation and associated experimental values (using 6-31G(d) and SDD basis sets)

| Compounds | Acetonitrile |                                                             |
|-----------|--------------|-------------------------------------------------------------|
|           | Expt.        | Theo. (Transition)                                          |
| <b>1</b>  | 712 nm       | 743 nm<br>L+2 → H (84%),<br>L+2 → H-1 (3%),<br>L+3 → H (8%) |
| <b>1a</b> | 712 nm       | 849 nm<br>L → H-1 (30%),<br>L → H (65%)                     |
| <b>1b</b> | 793 nm       | 1161 nm<br>L → H (96%), L<br>→ H-1(3%)                      |
| <b>2</b>  | 786 nm       | 790 nm<br>L → H-1 (12%),<br>L → H (80%)                     |
| <b>2a</b> | 806 nm       | 988 nm<br>L → H (83%)<br>L → H-1 (9%),                      |
| <b>2b</b> | 834 nm       | 1200 nm<br>L → H-1 (29%),<br>L → H (63%)                    |

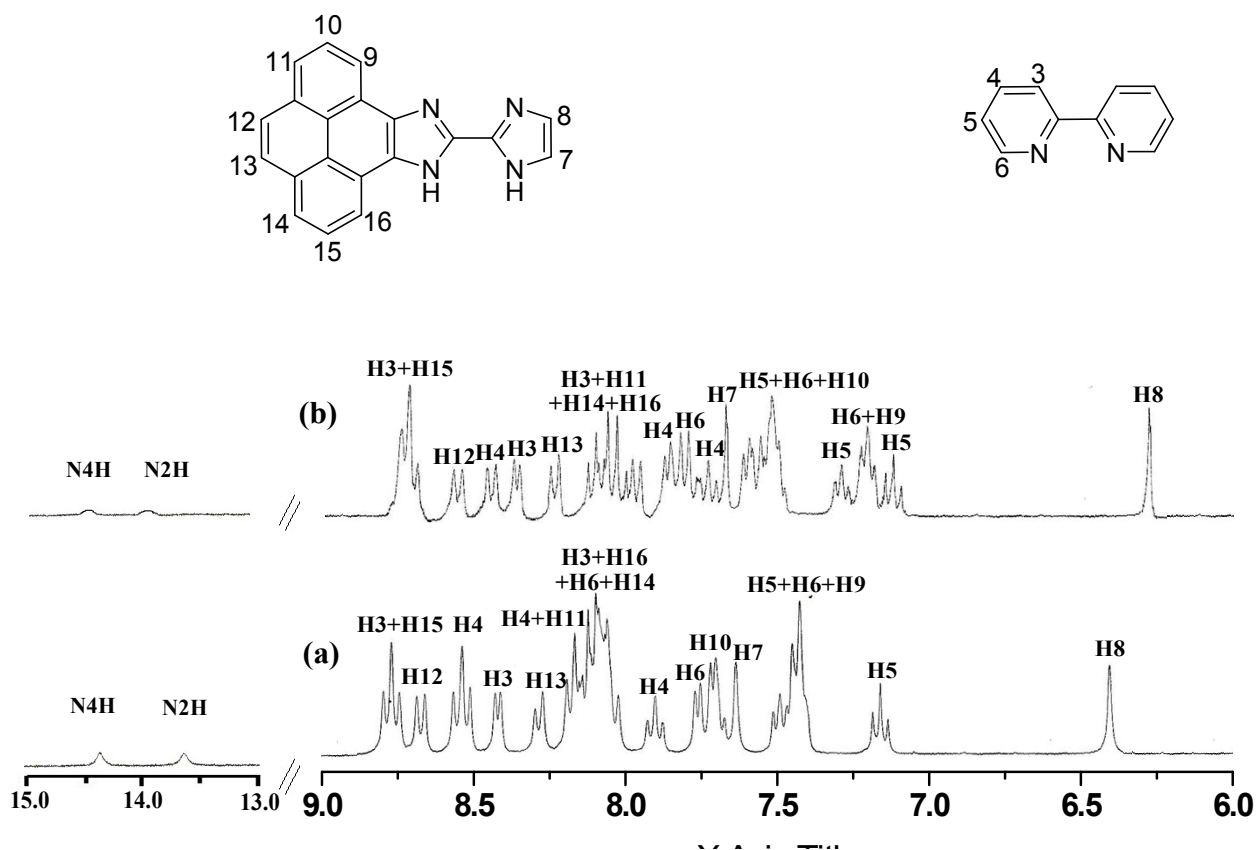

Fig. S1  $^1\text{H}$  NMR spectra of **1** (a) and **2** (b) (300 MHz) in  $\text{DMSO-}d_6$ .

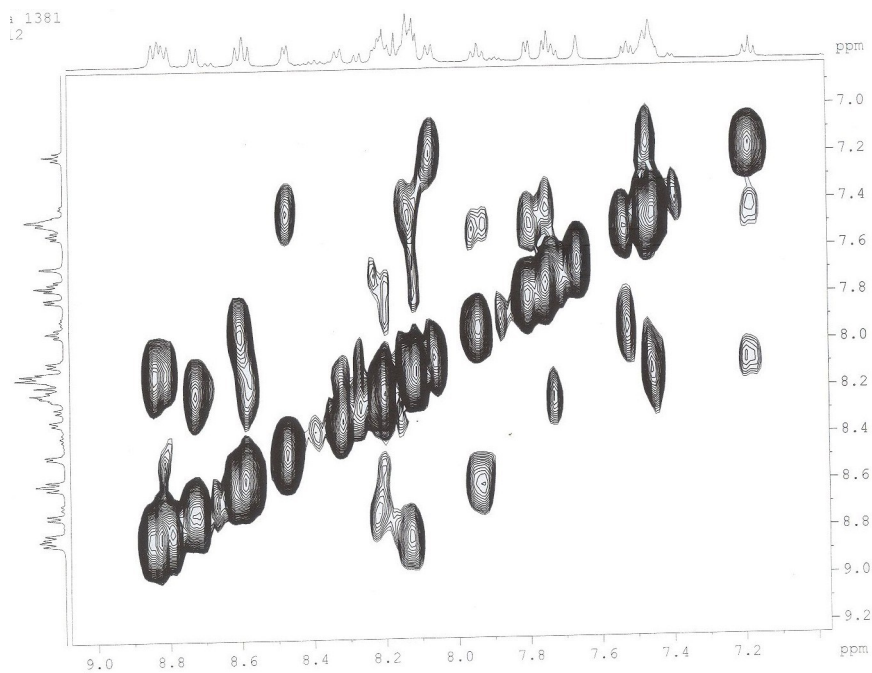

**Fig. S2**  $^1\text{H}$ - $^1\text{H}$  COSY NMR spectrum of **1** in  $\text{DMSO-}d_6$ .

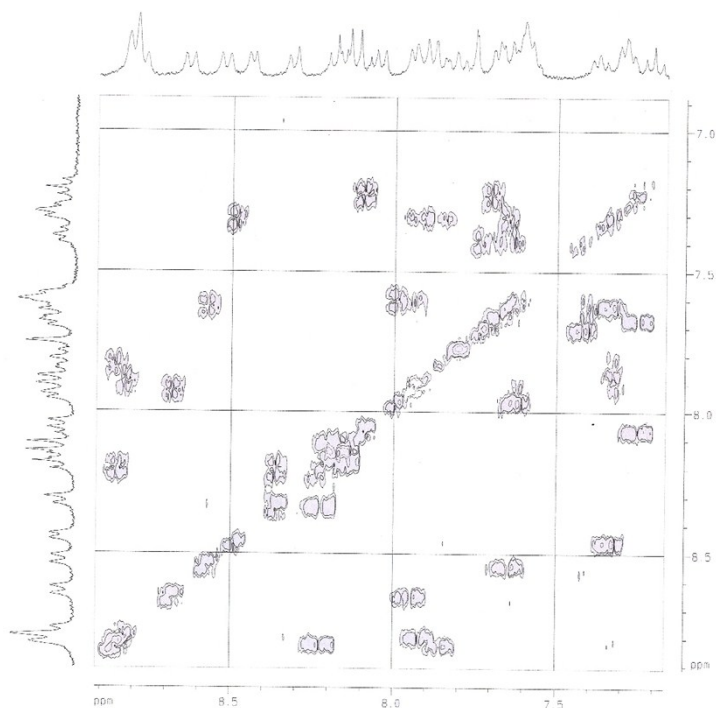

**Fig. S3**  $^1\text{H}$ - $^1\text{H}$  COSY NMR spectrum of **2** in  $\text{DMSO-}d_6$ .

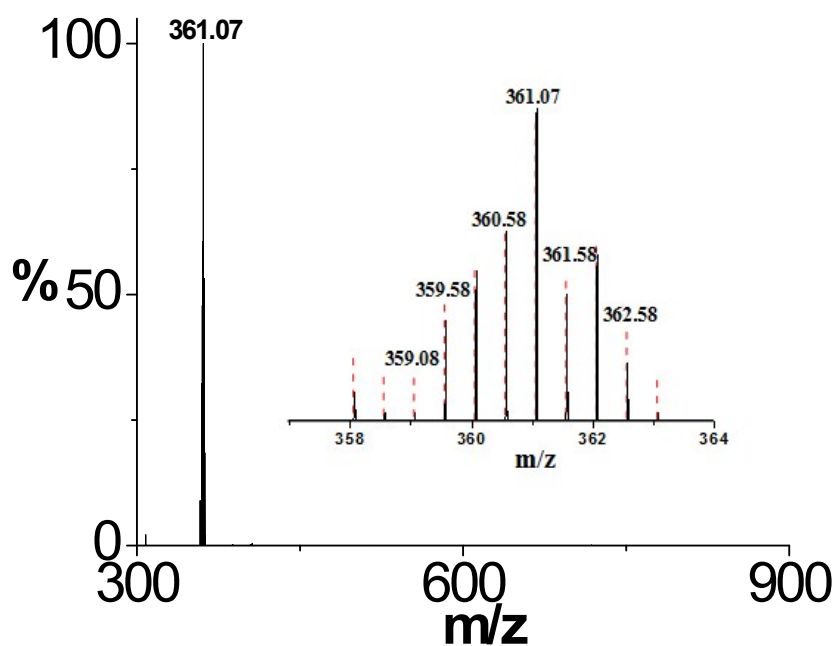

**Fig. S4** ESI-MS (positive) for the complex cation  $[(bpy)_2Ru(Py-BiimzH_2)]^{2+}$  ( $m/z = 361.07$ ) in acetonitrile showing the observed and isotopic distribution patterns.

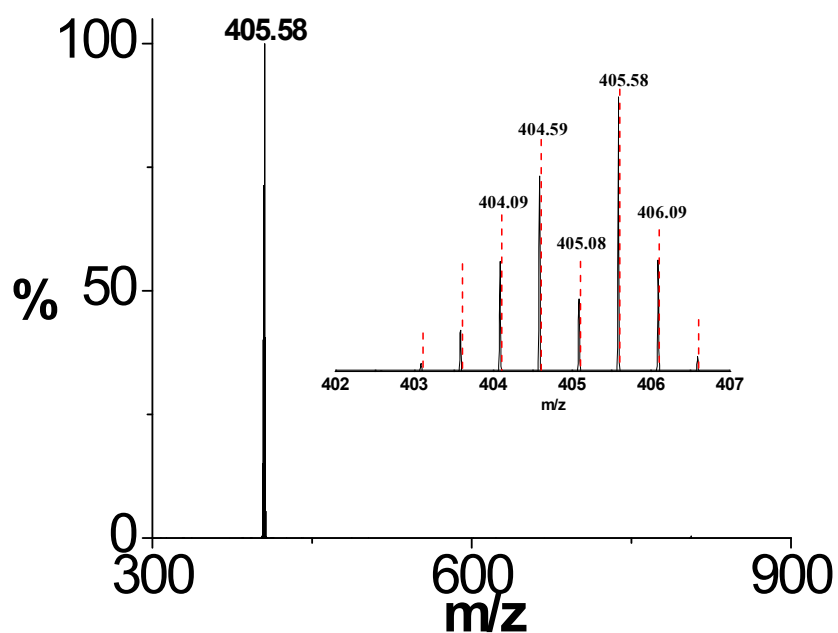

**Fig. S5** ESI-MS (positive) for the complex cation  $[(bpy)_2Os(Py-BiimzH_2)]^{2+}$  ( $m/z = 405.58$ ) in acetonitrile showing the observed and isotopic distribution patterns.

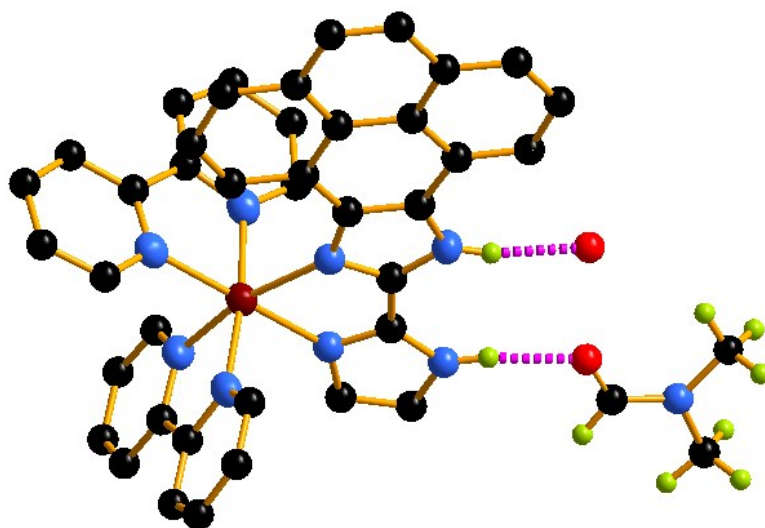

**Fig. S6** Strong hydrogen bonding interactions between the N-H imidazole protons of receptor **1** with water and dimethylformamide solvents.

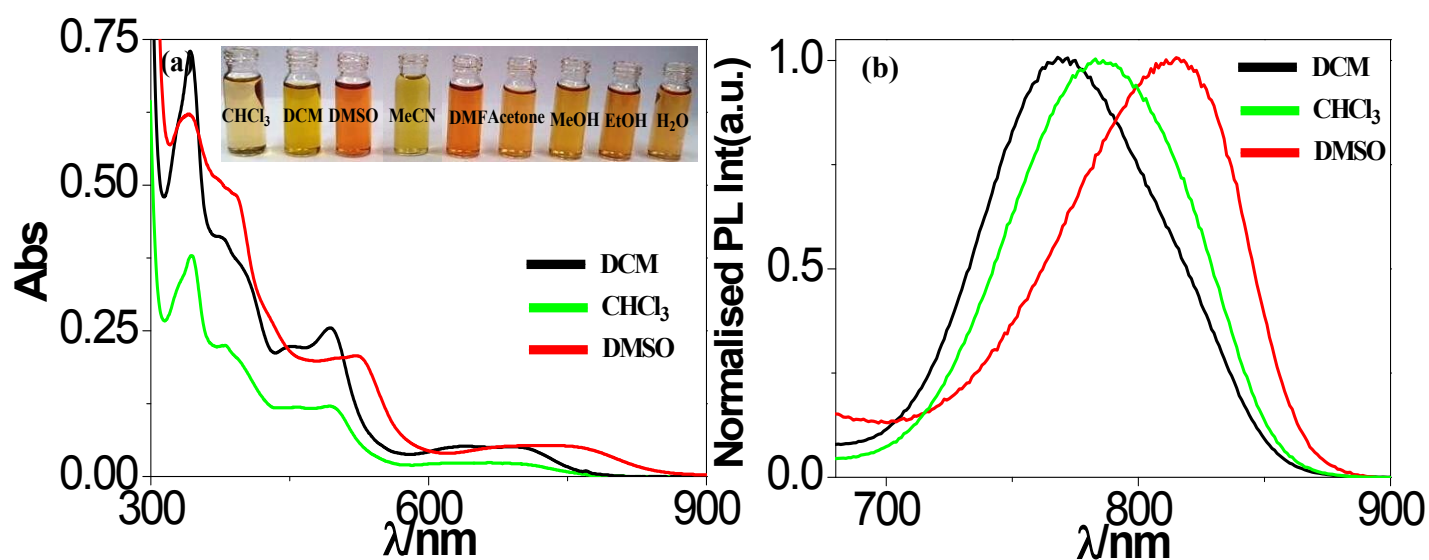

**Fig. S7** Changes in UV-vis absorption (a) and emission spectral profiles (b) (normalised) of **2** in few selective solvents.

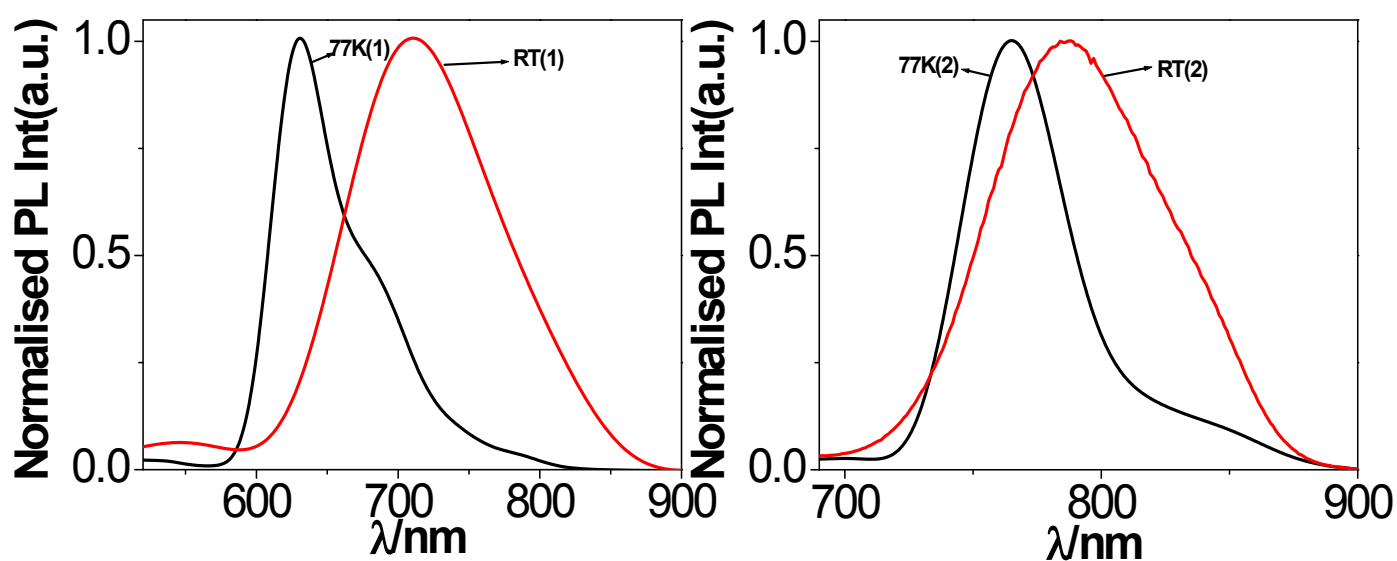

**Fig. S8** Luminescence spectra of **1** (a) and **2** (b) in MeCN at room temperature and at 77K in MeOH: EtOH (1:4) glass.

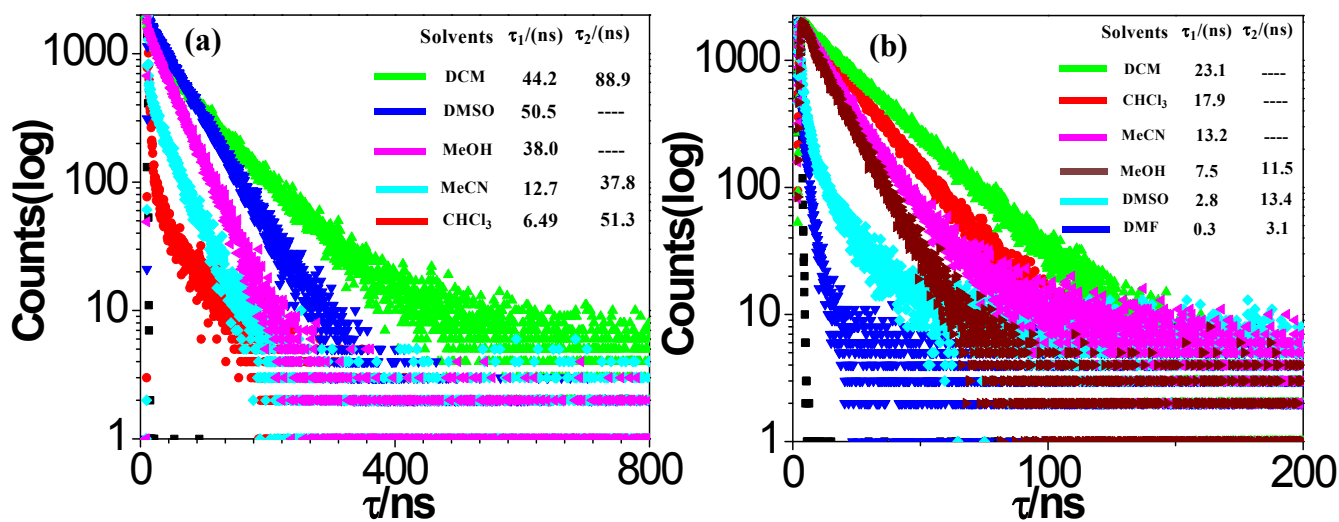

**Fig. S9** Decay profiles of **1** (a) and **2** (b) in few selected solvents. Insets show the corresponding lifetimes.

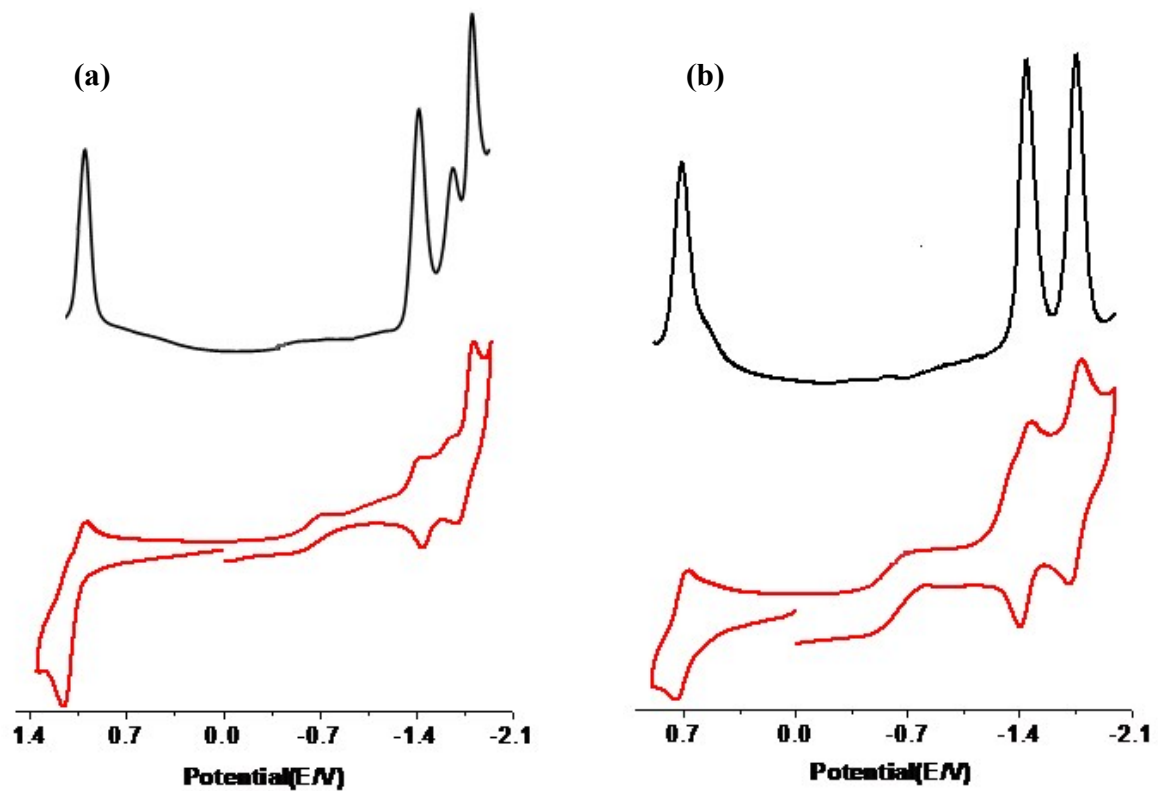

**Fig. S10** Cyclic voltammograms and square wave voltammograms of **1** (a) and **2** (b) in acetonitrile at a scan rate of 100 mV/s showing both oxidation and reduction of the complexes.

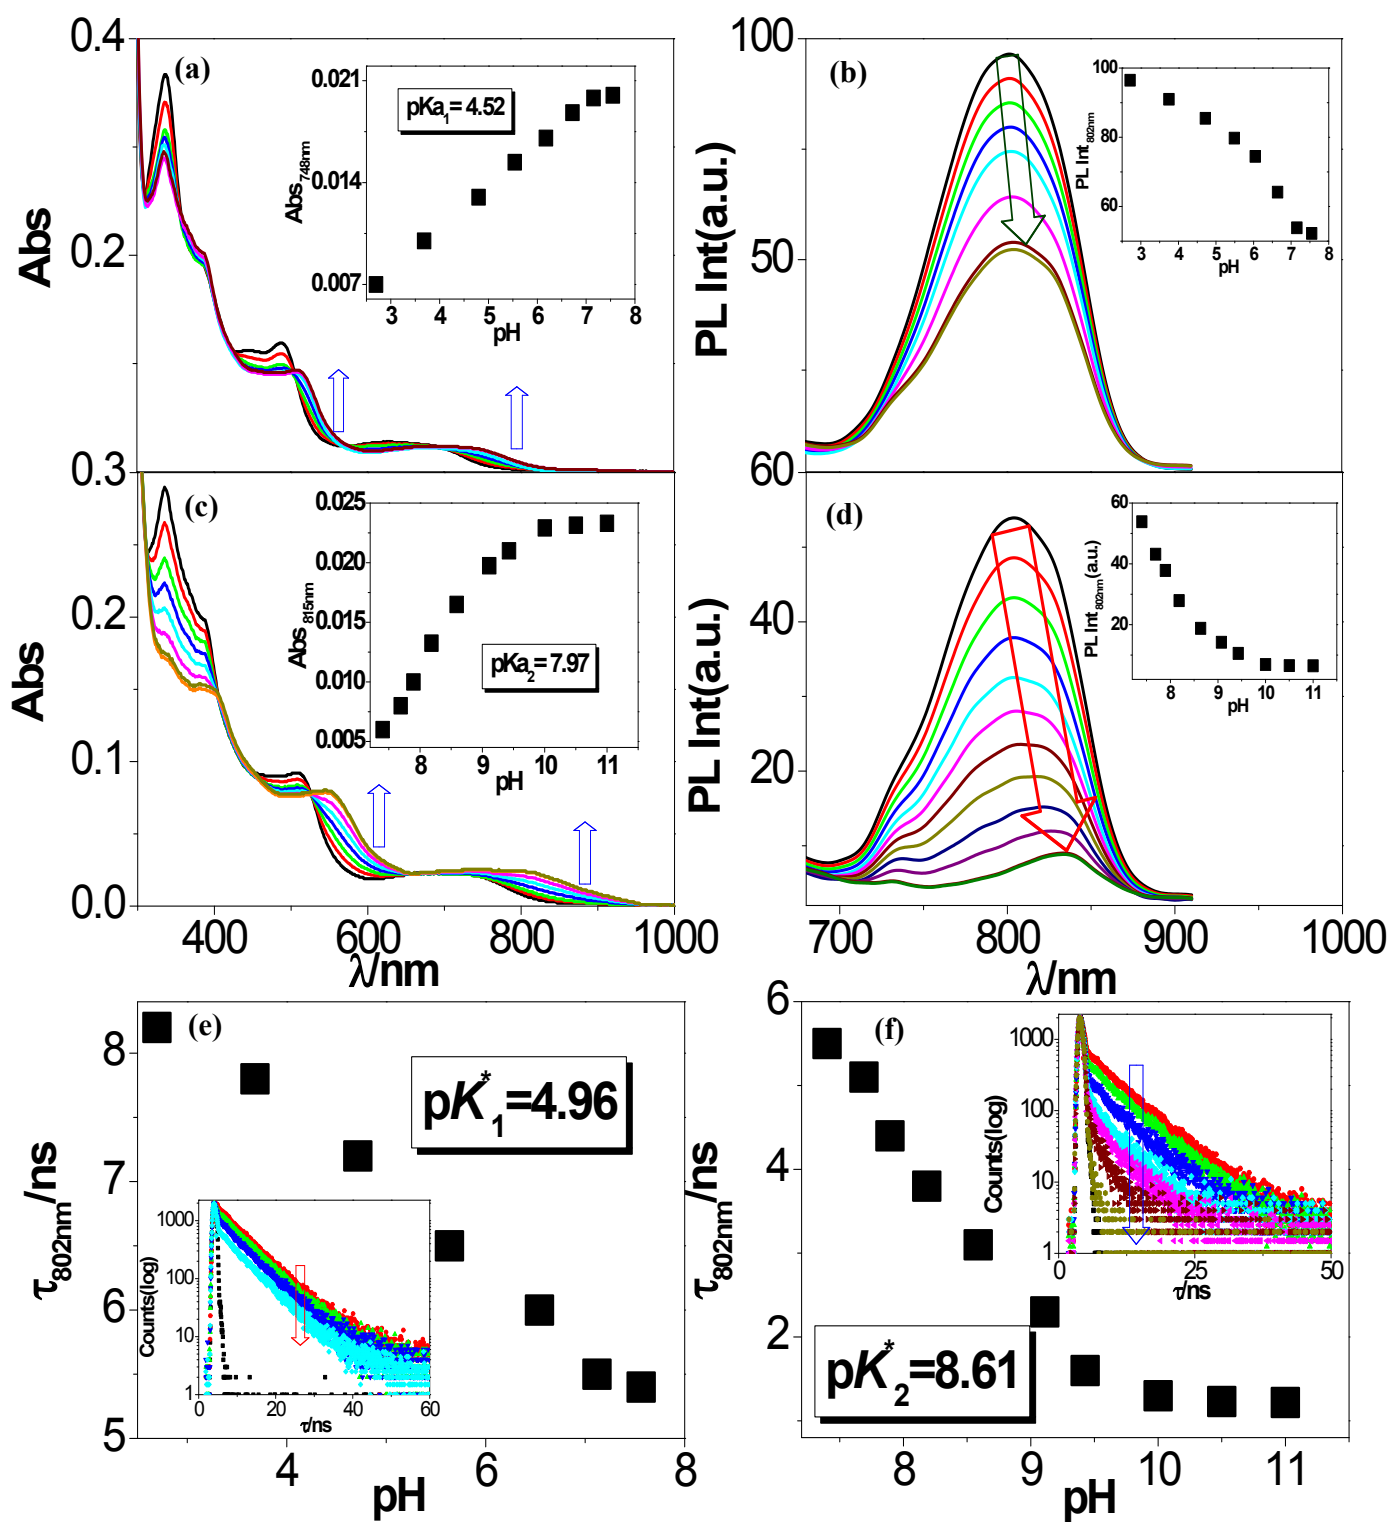

**Fig. S11** Changes in absorption, emission and excited state lifetimes of **2** within the pH range 2.5-7.6 (a, b and e) and 7.6-12 (c, d and f) respectively in MeCN/ H<sub>2</sub>O (1/9 v/v) mixture. Insets show the variation of absorption, emission and decay profiles with pH.



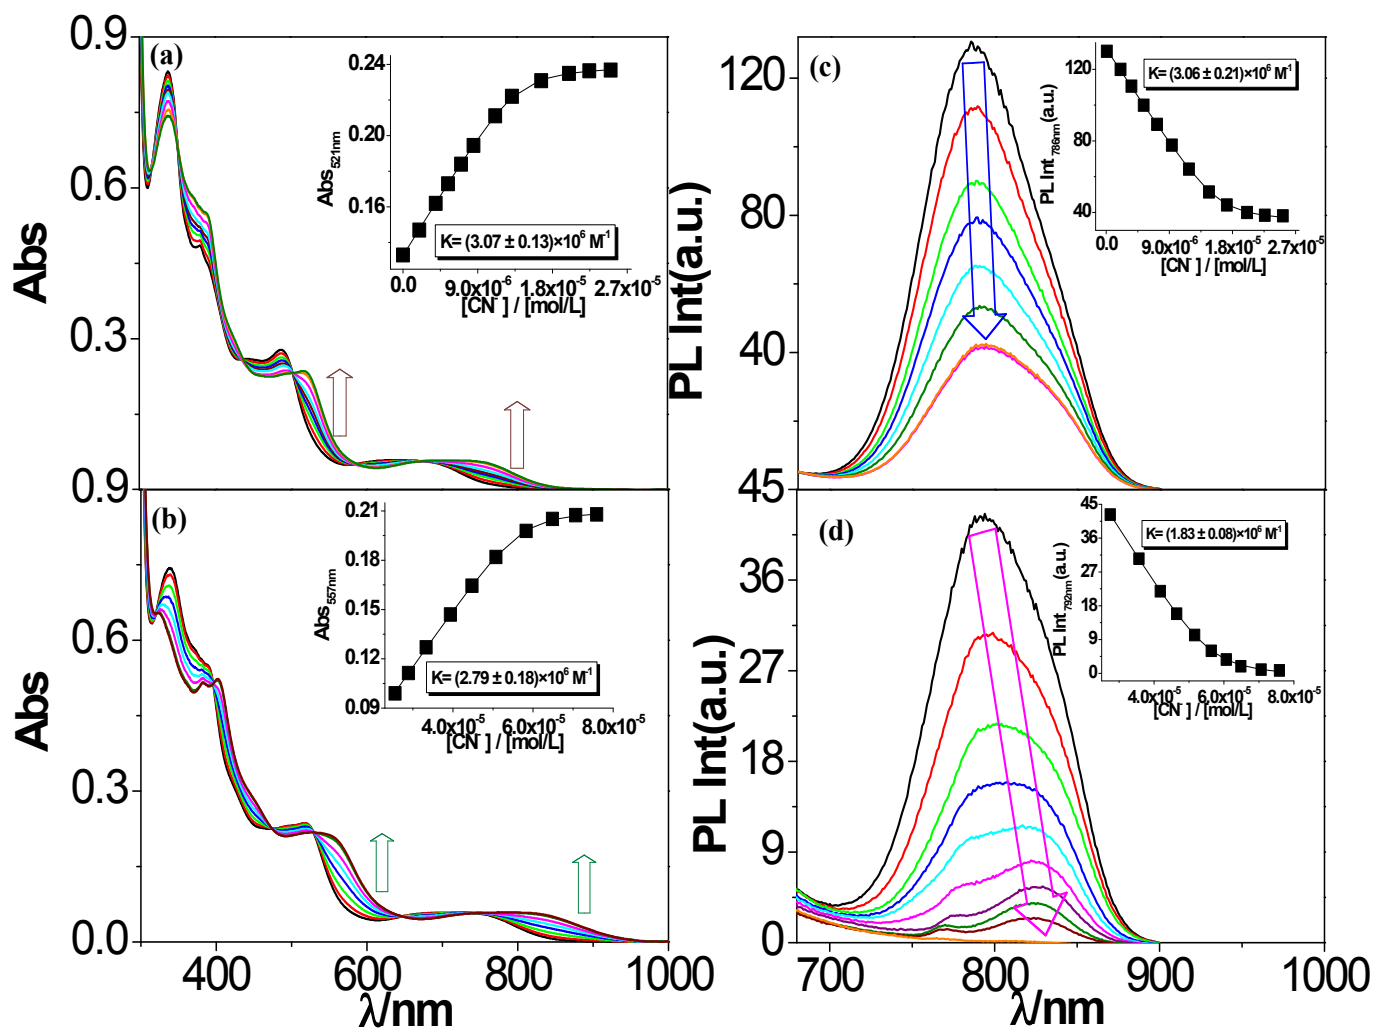

**Fig. S12** Changes in UV-vis absorption (a and b) and luminescence (c and d) spectral profiles of **2** in acetonitrile solution upon the addition of CN<sup>-</sup> ion. The inset shows the fit of the experimental absorbance and luminescence data to a 1:1 binding profile.

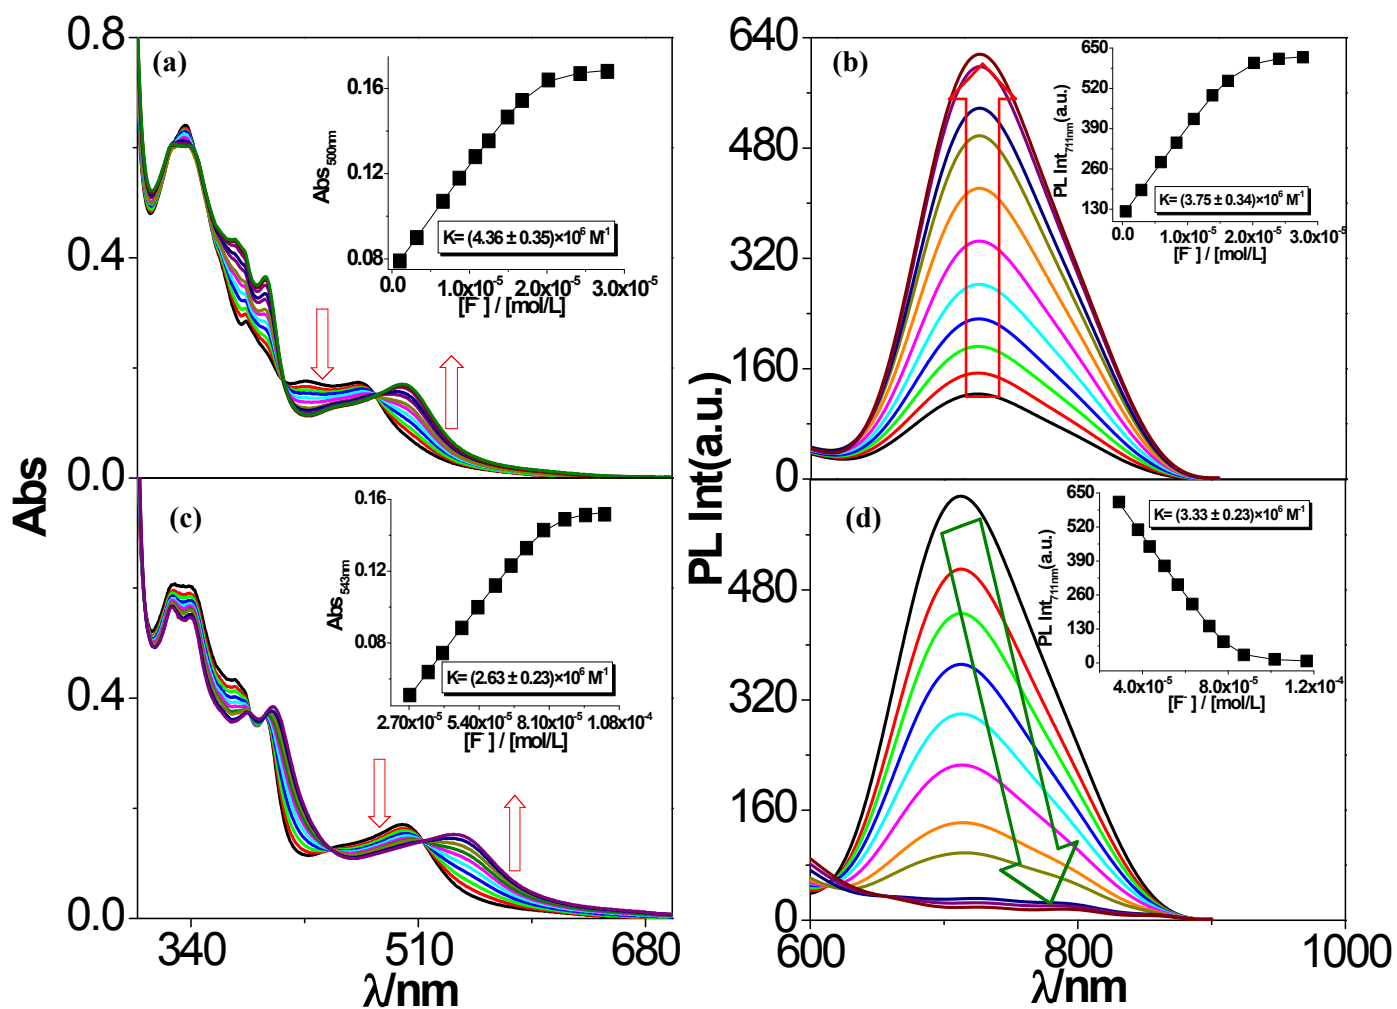

**Fig. S13** Changes in UV-vis absorption (a and c) and luminescence (b and d) spectra of complex 1 in acetonitrile solution upon the addition of  $F^-$  ion. The inset shows the fit of the experimental absorbance and luminescence data to a 1:1 binding profile.

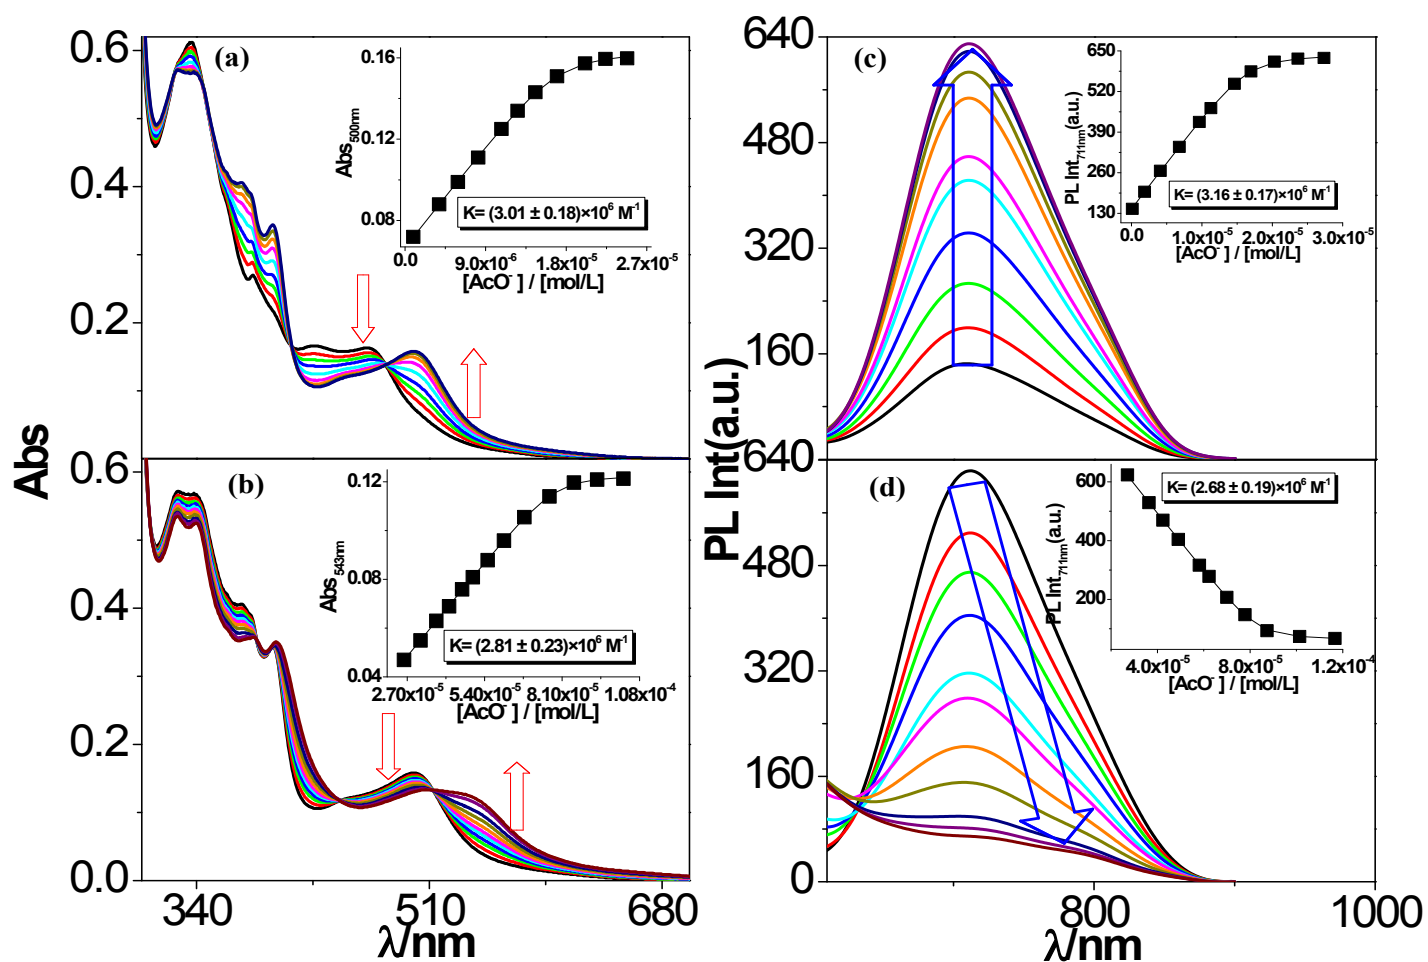

**Fig. S14** Changes in UV-vis absorption (a and b) and luminescence (c and d) spectra of complex 1 in acetonitrile solution upon the addition of AcO<sup>-</sup> ion. The inset shows the fit of the experimental absorbance and luminescence data to a 1:1 binding profile.

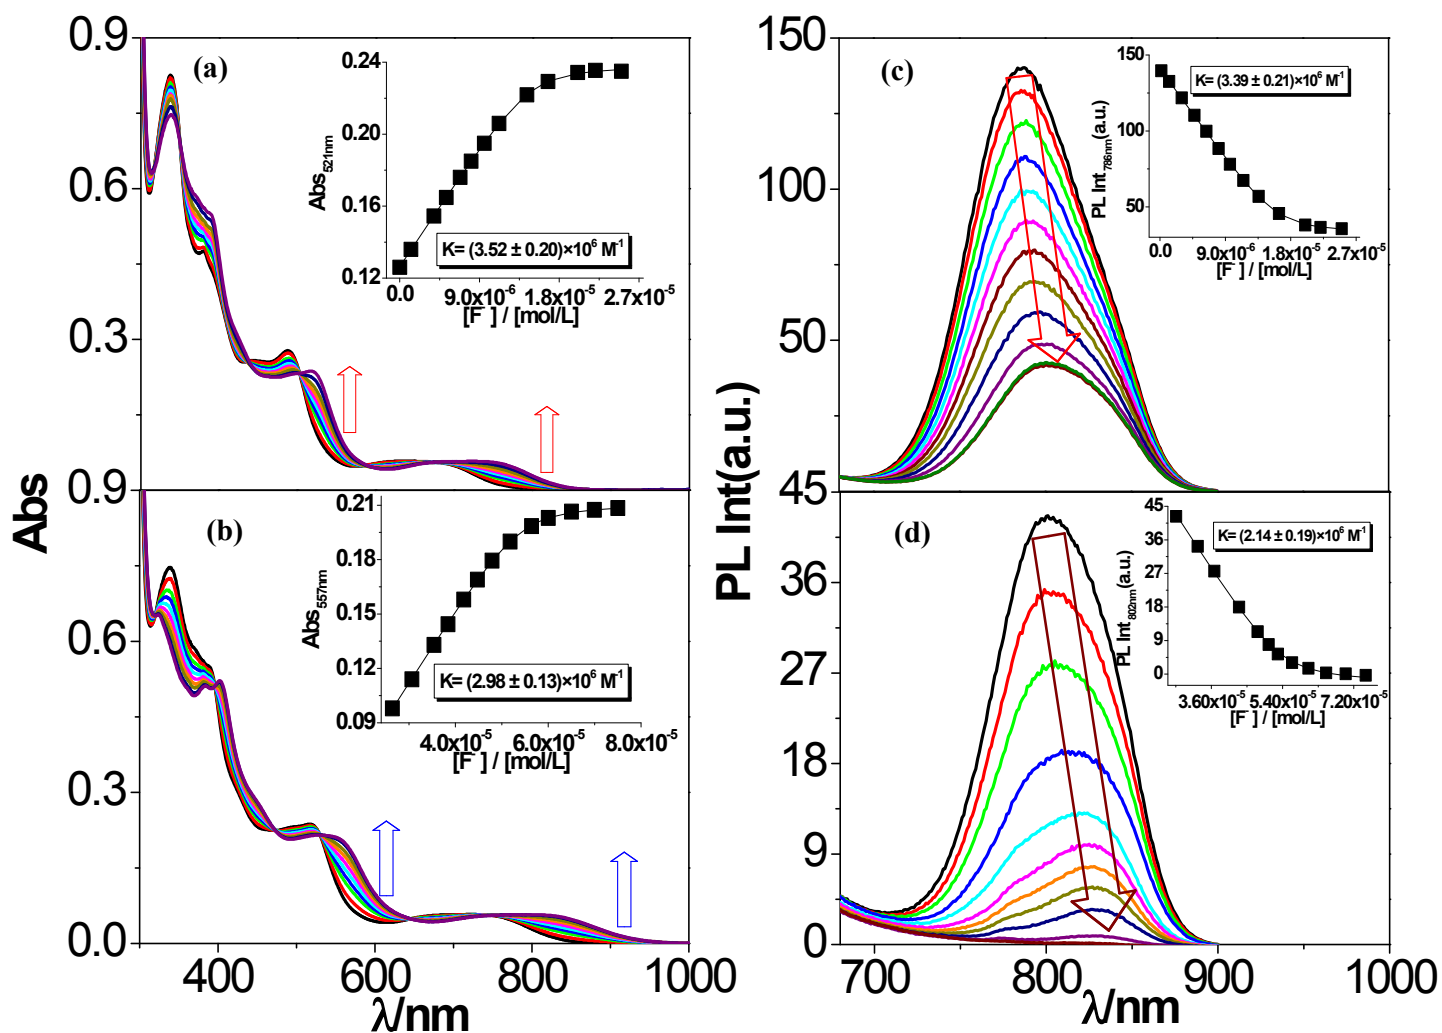

**Fig. S15** Changes in UV-vis absorption (a and b) and luminescence (c and d) spectra of complex **2** in acetonitrile solution upon the addition of  $F^-$  ion. The inset shows the fit of the experimental absorbance and luminescence data to a 1:1 binding profile.

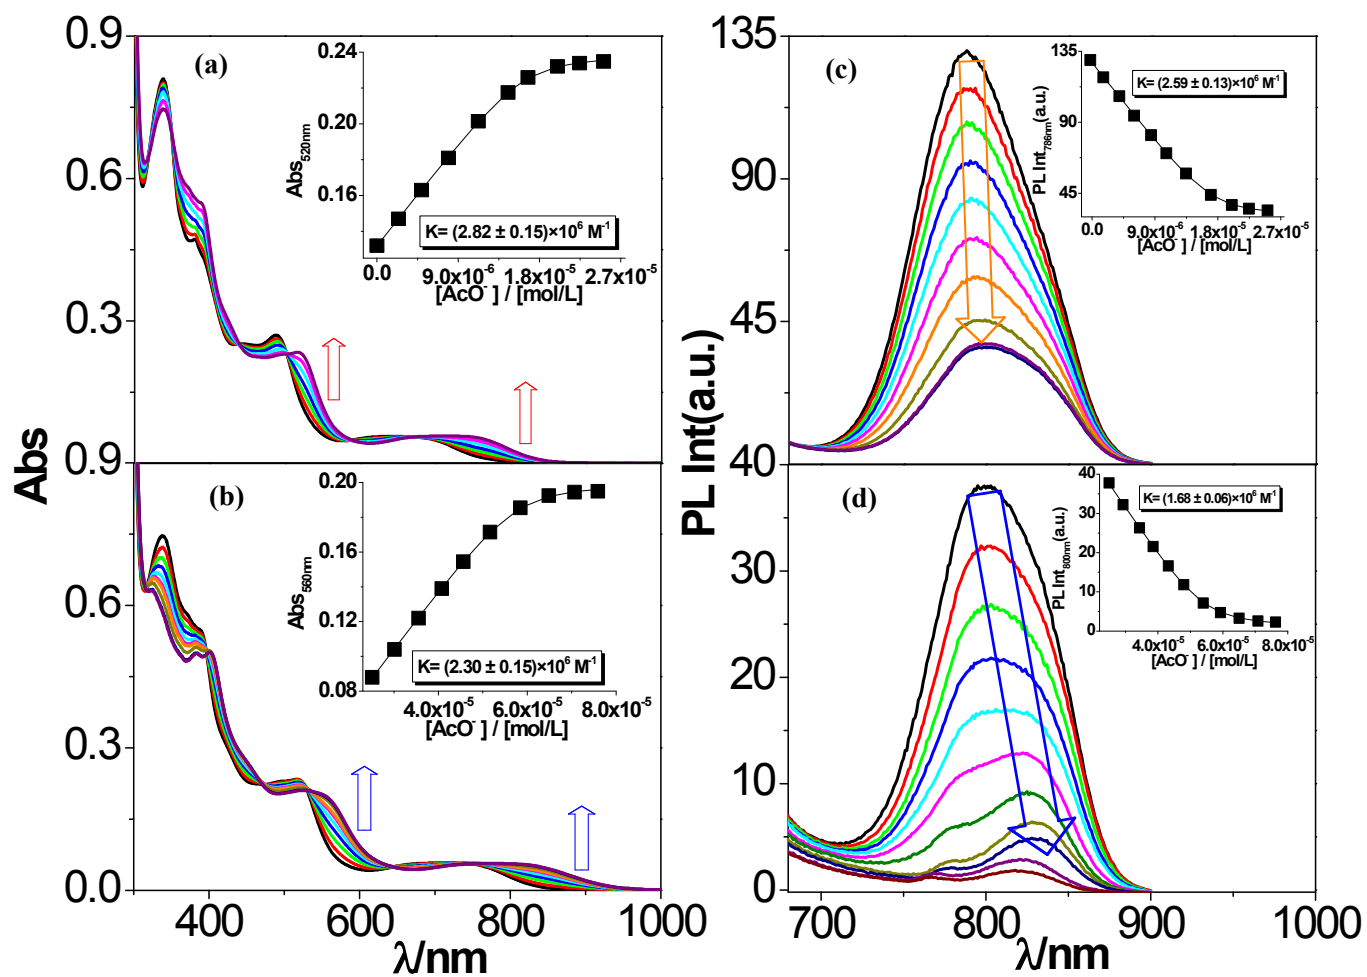

**Fig. S16** Changes in UV-vis absorption (a and b) and luminescence (c and d) spectra of complex 2 in acetonitrile solution upon the addition of AcO<sup>-</sup> ion. The inset shows the fit of the experimental absorbance and luminescence data to a 1:1 binding profile.

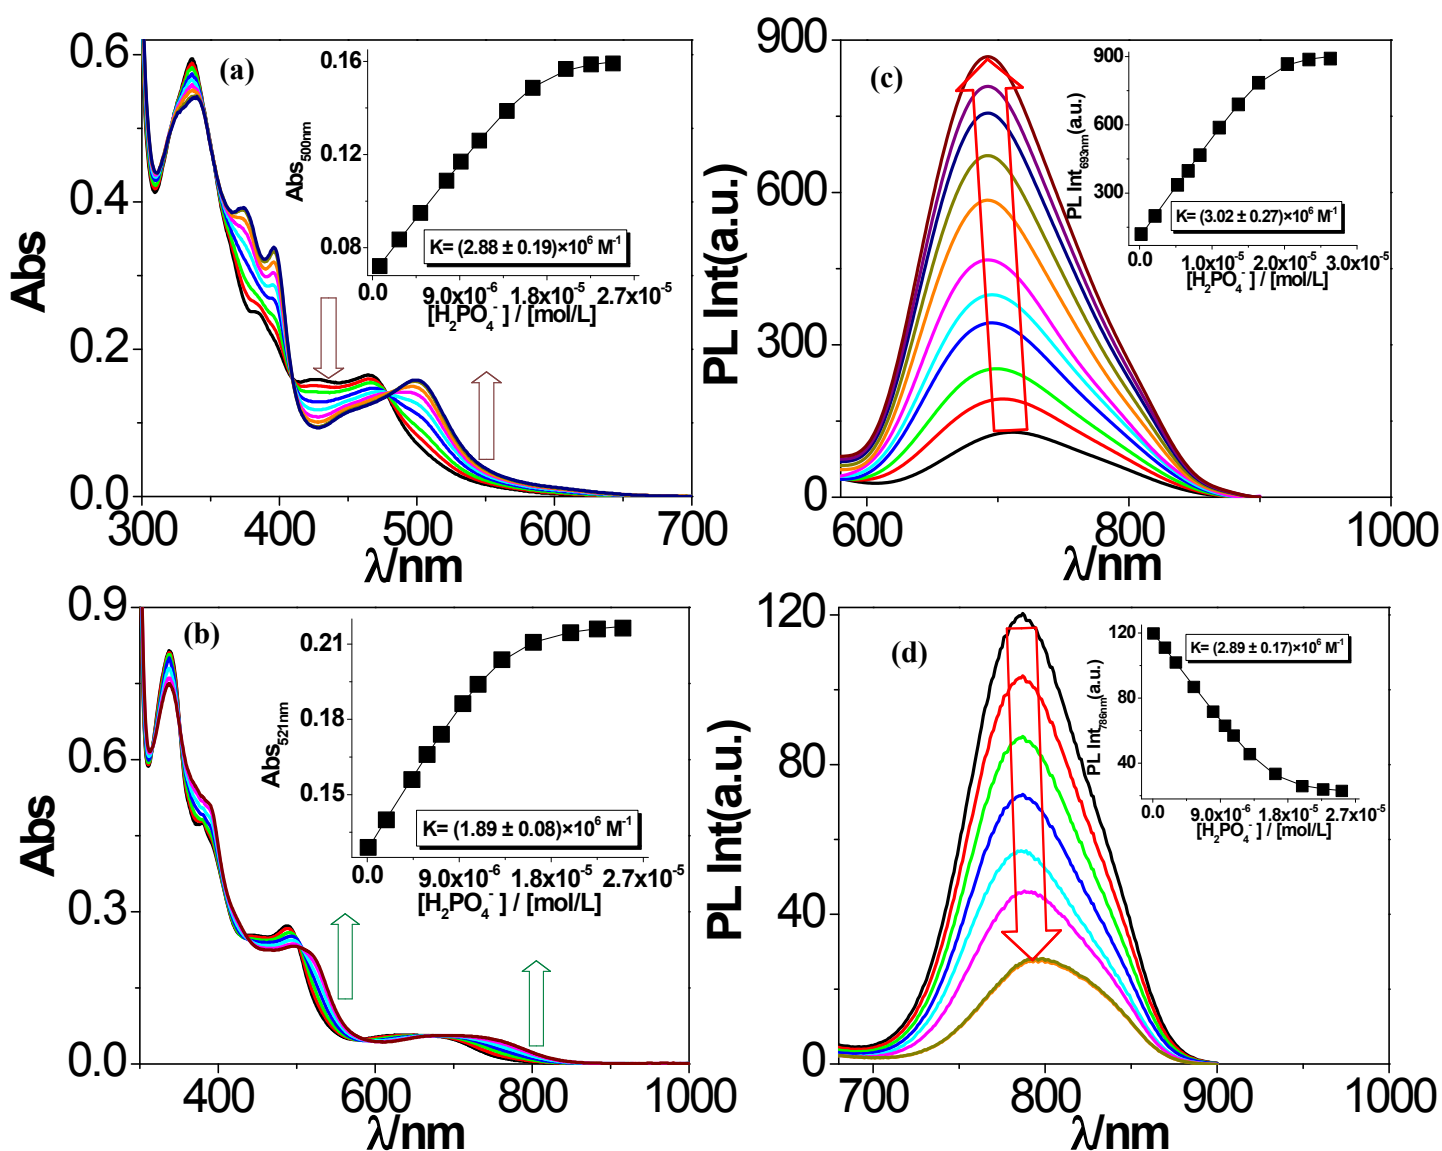

**Fig. S17** Changes in UV-vis absorption (a and b) and luminescence (c and d) spectral profiles for **1** and **2**, respectively in acetonitrile solution upon the addition of  $\text{H}_2\text{PO}_4^-$  ion. The inset shows the fit of the experimental absorbance and luminescence data to a 1:1 binding profile.

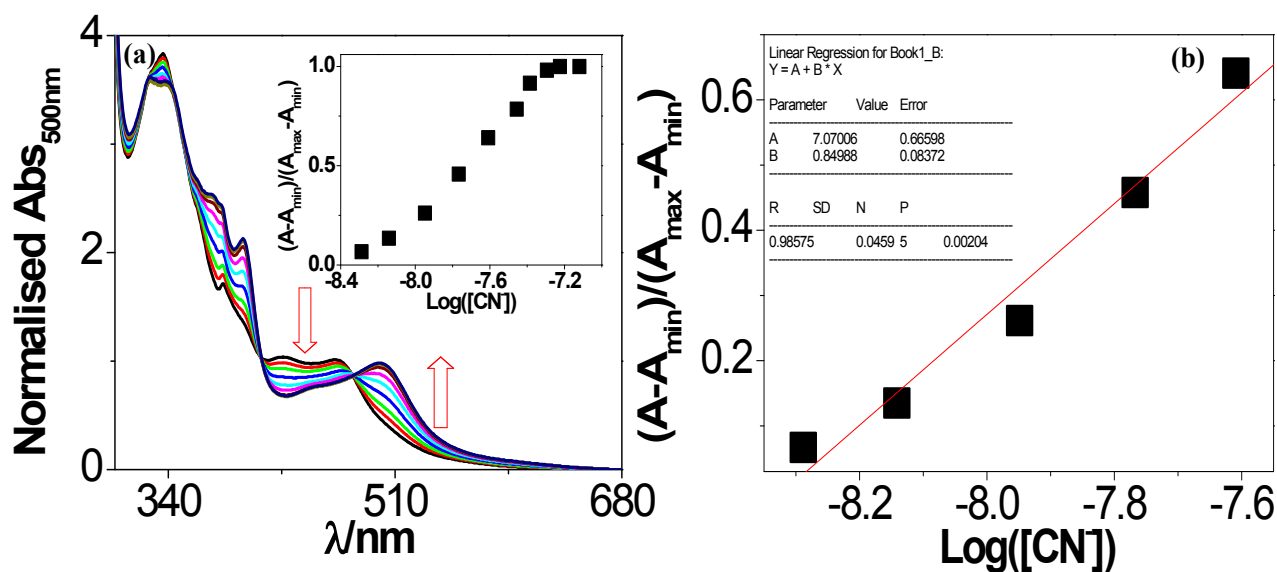

**Fig. S18** (a) Absorption spectral change during the titration of **1** with  $\text{CN}^-$  in acetonitrile, inset shows the normalized absorbance between the minimum absorbance (free complex **1**) and the maximum absorbance. (b) A plot of  $(A-A_{\min})/(A_{\max}-A_{\min})$  vs  $\text{Log}([\text{CN}^-])$ , the calculated detection limit of receptor is  $5.24 \times 10^{-9}$  M.

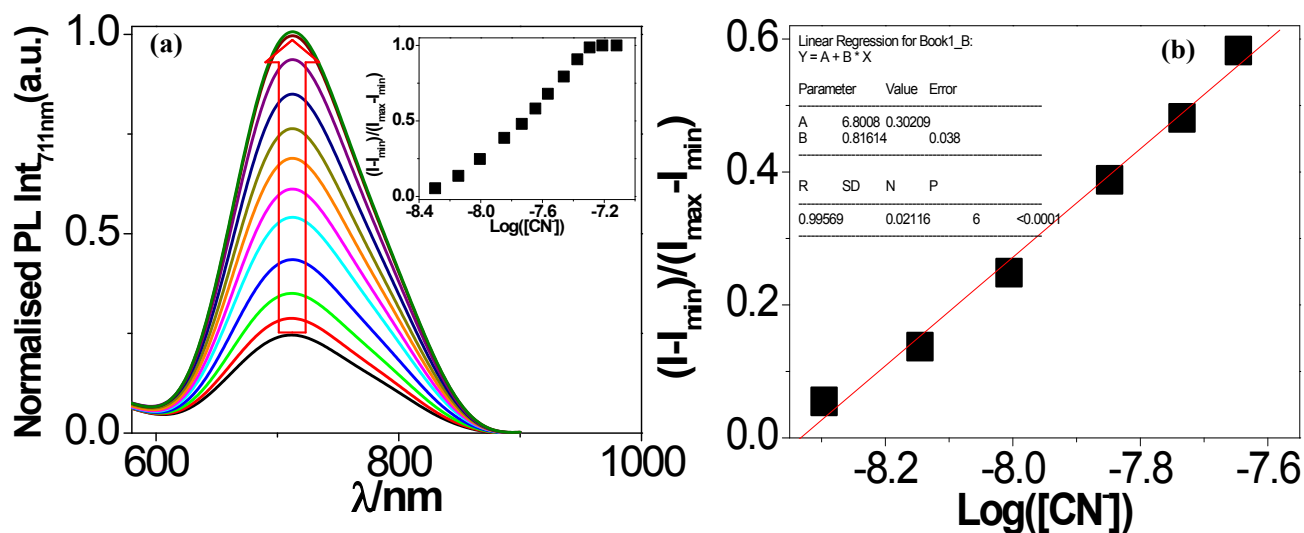

**Fig. S19** (a) Fluorescence spectral change during the titration of **1** with  $\text{CN}^-$  in acetonitrile, inset shows the normalized intensity between the minimum intensity (free complex **1**) and the maximum intensity. (b) A plot of  $(I-I_{\min})/(I_{\max}-I_{\min})$  vs  $\text{Log}([\text{CN}^-])$ , the calculated detection limit of receptor is  $4.67 \times 10^{-9}$  M.

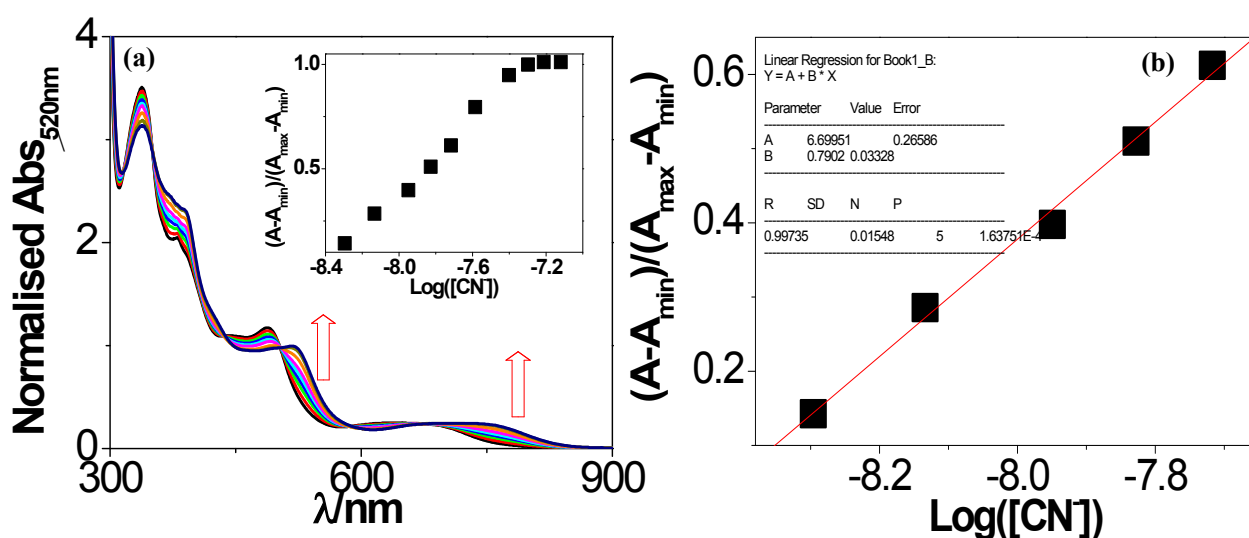

**Fig. S20** (a) Absorption spectral change during the titration of **2** with  $\text{CN}^-$  in acetonitrile, inset shows the normalized absorbance between the minimum absorbance (free complex **2**) and the maximum absorbance. (b) A plot of  $(A-A_{\min})/(A_{\max}-A_{\min})$  vs  $\text{Log}([\text{CN}^-])$ , the calculated detection limit of receptor is  $4.46 \times 10^{-9}$  M.

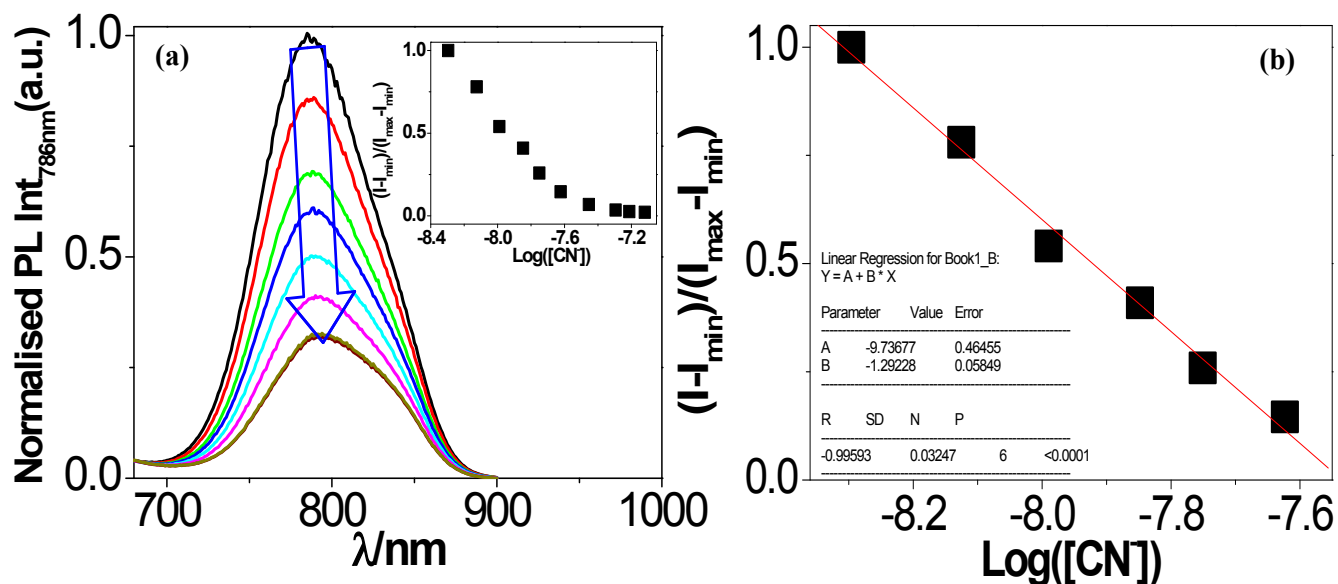

**Fig. S21** (a) Fluorescence spectral change during the titration of **2** with  $\text{CN}^-$  in acetonitrile, inset shows the normalized intensity between the minimum intensity (free complex **2**) and the maximum intensity. (b) A plot of  $(I-I_{\min})/(I_{\max}-I_{\min})$  vs  $\text{Log}([\text{CN}^-])$ , the calculated detection limit of receptor is  $4.57 \times 10^{-9}$  M.



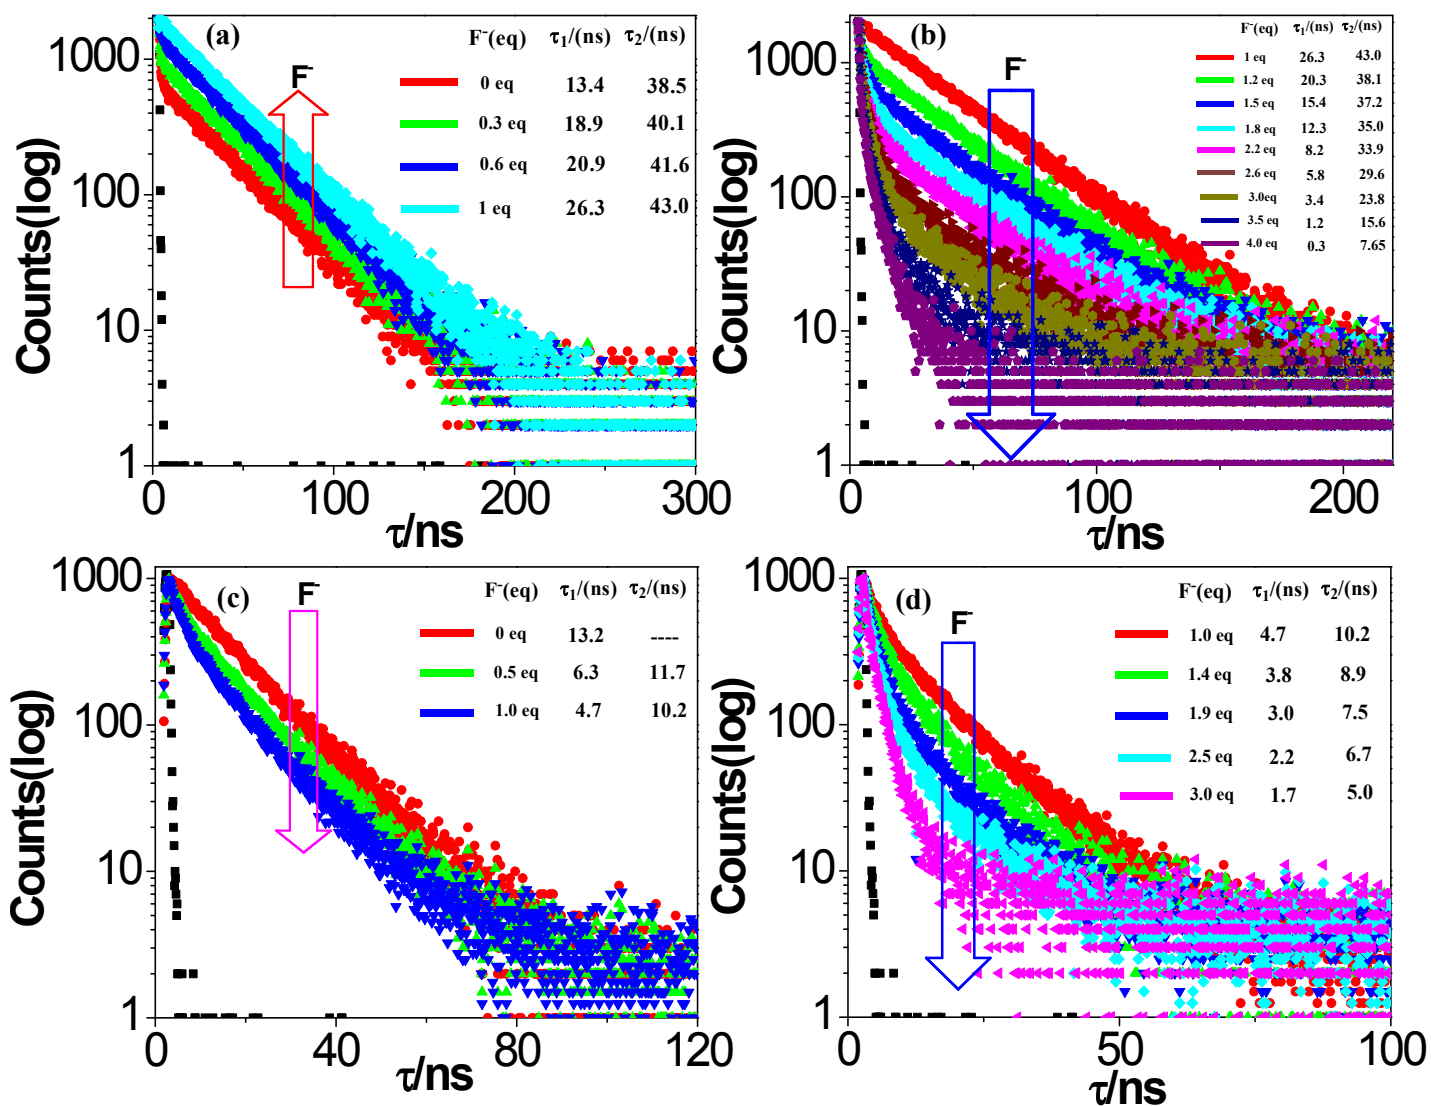

**Fig. S22** Changes in the time-resolved luminescence decays for **1** (a and b) with incremental addition of  $F^-$  (0-4 equiv) and for **2** (c and d) with  $F^-$  (0-3 equiv) in acetonitrile solution. Insets show the lifetime values.

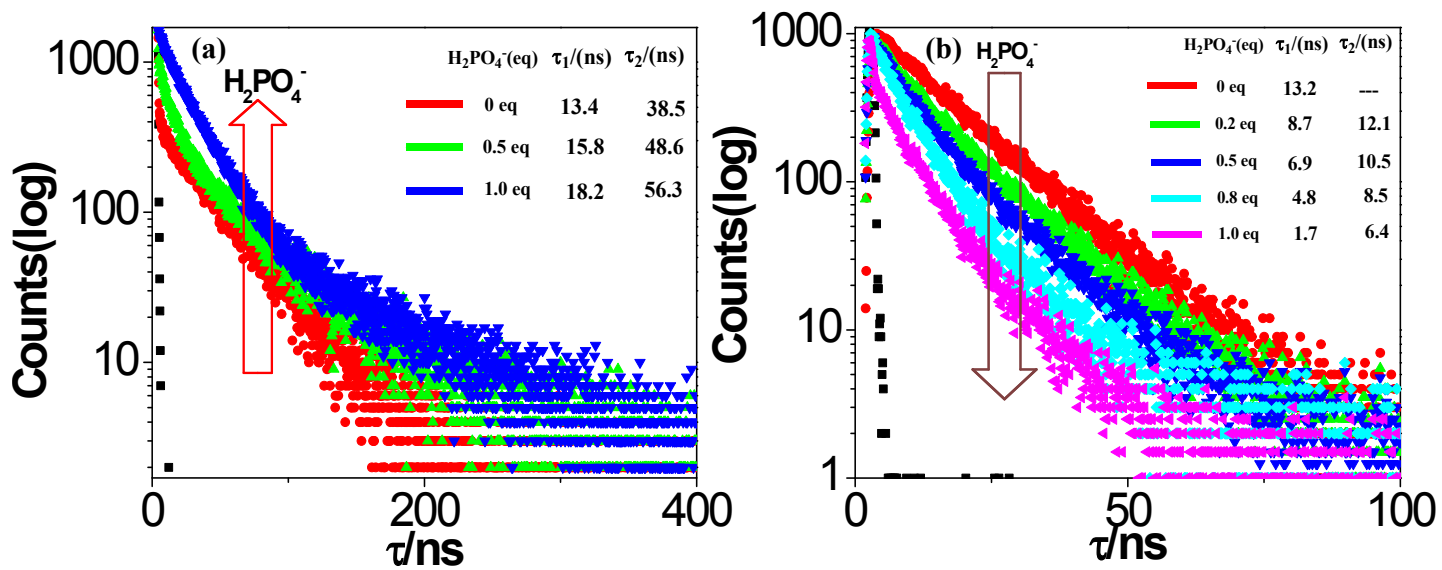

**Fig. S23** Changes in the time-resolved luminescence decays for **1** (a) and **2** (b) with incremental addition of  $\text{H}_2\text{PO}_4^-$  in acetonitrile solution. Insets show the lifetime values.

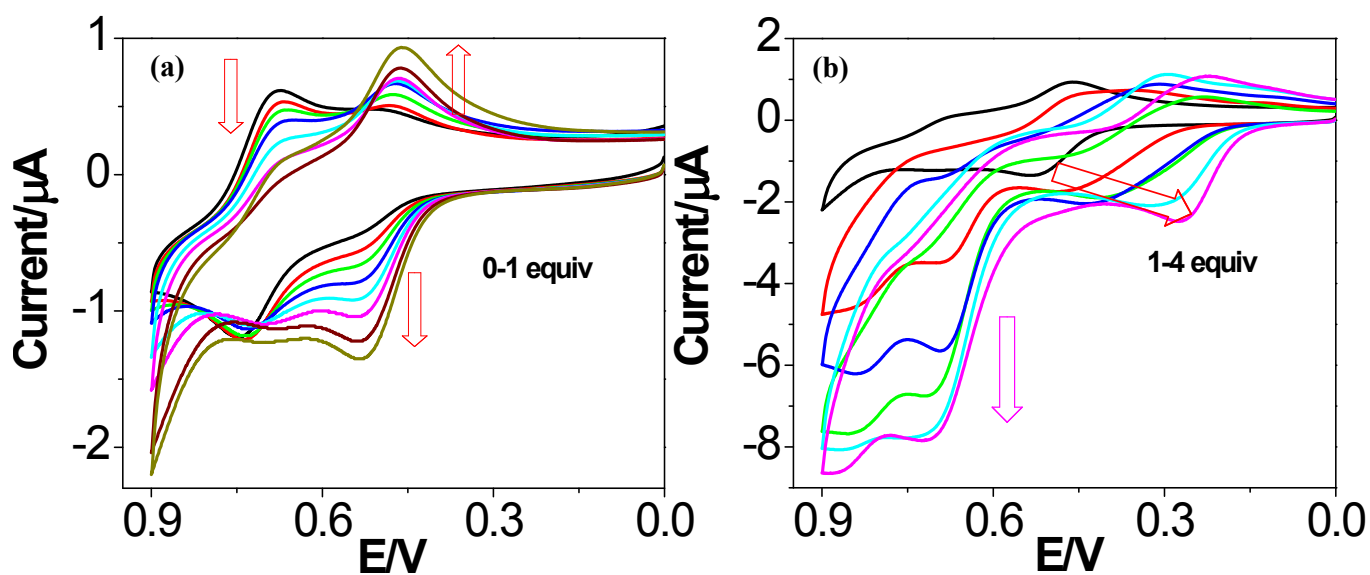

**Fig. S24** Changes in the oxidation process of complex **2** in terms of CV (a and b) with incremental addition of CN<sup>-</sup> ion in its acetonitrile solution.

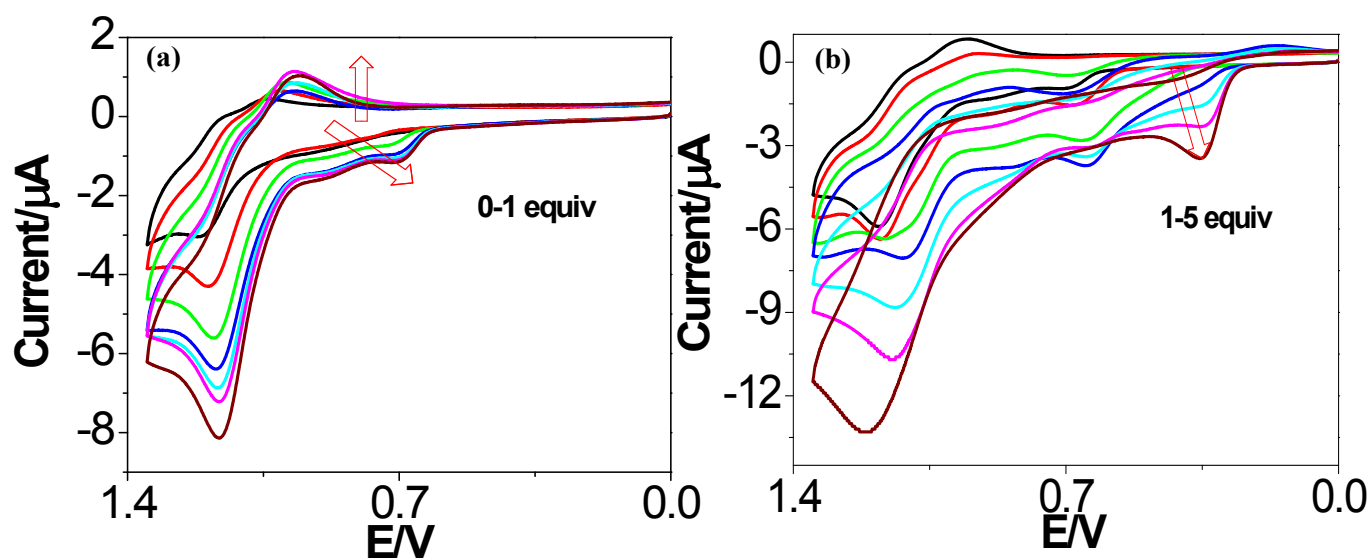

**Fig. S25** Changes in the oxidation process of complex **1** in terms of CV (a and b) with incremental addition of CN<sup>-</sup> ion in its acetonitrile solution.

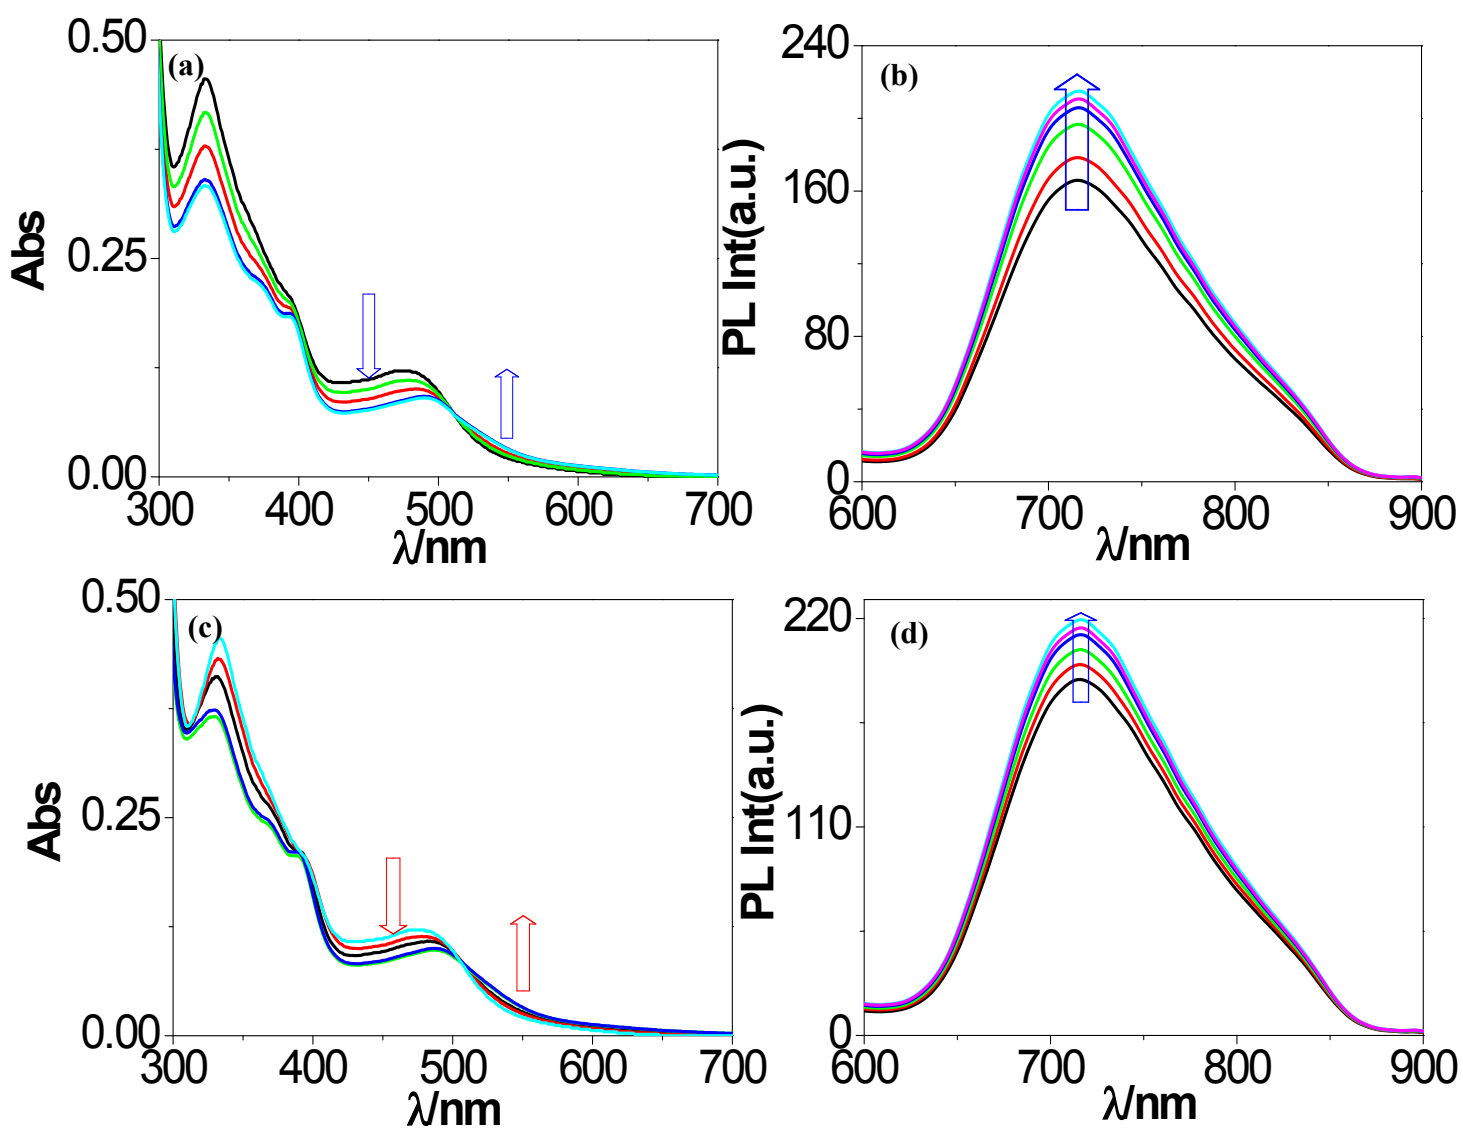

**Fig. S26** Changes in UV-vis absorption (a and c) and luminescence (b and d) spectra of complex **1** in aqueous buffer solution (pH=7) upon the addition of  $\text{CO}_3^{2-}$  and  $\text{S}^{2-}$  ion respectively.

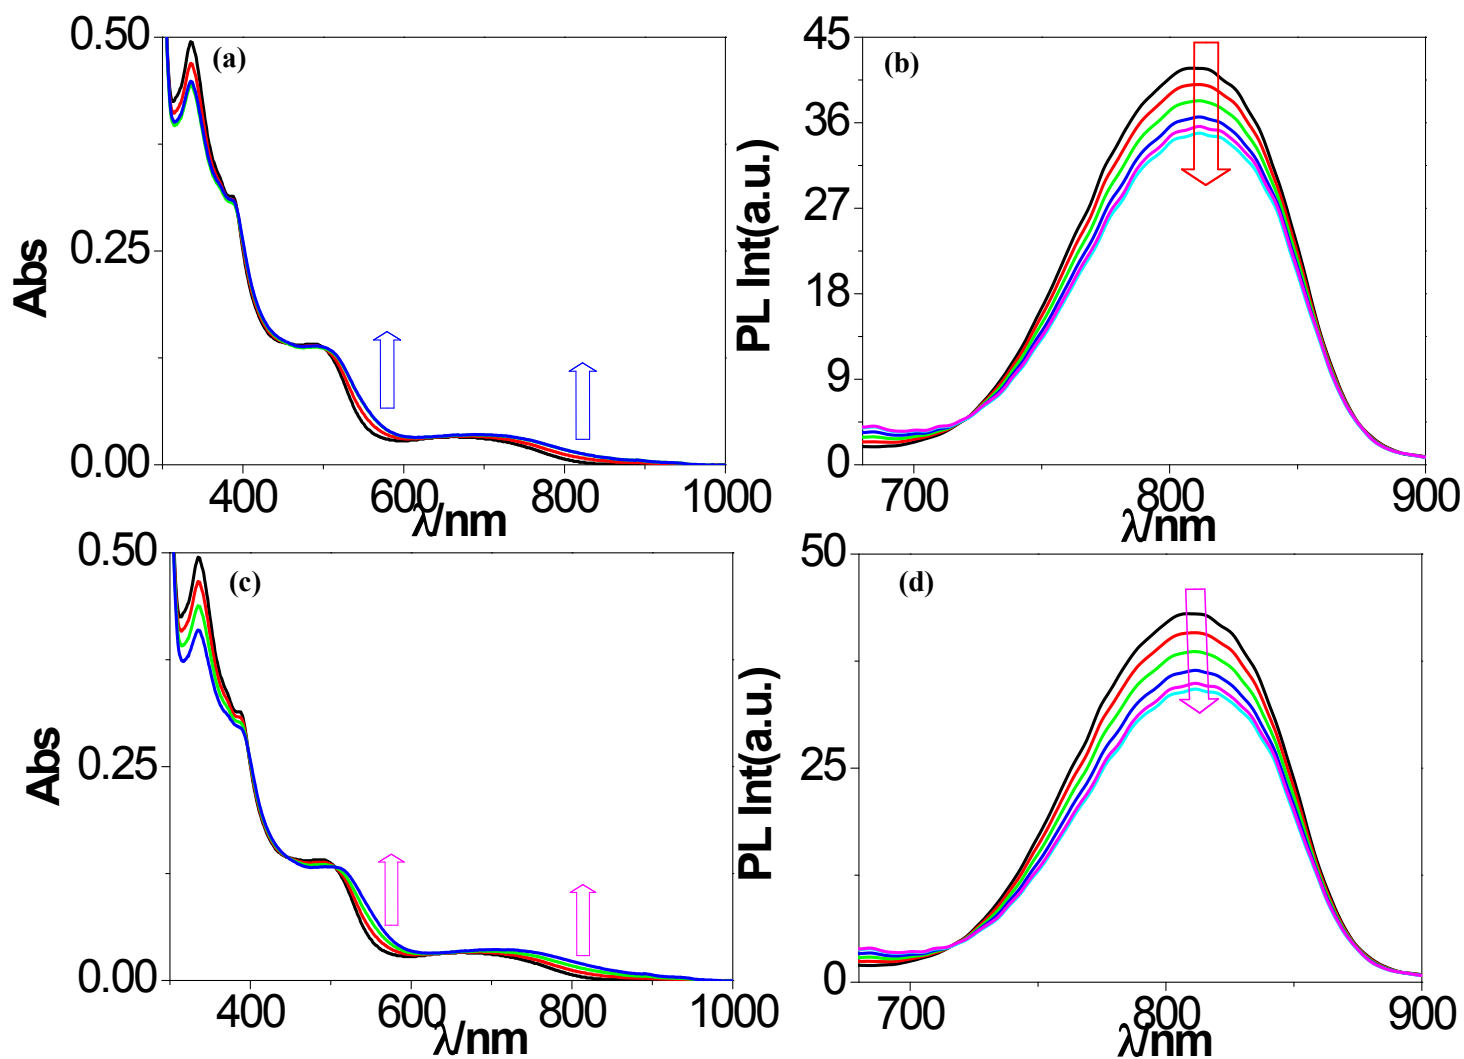

**Fig. S27** Changes in UV-vis absorption (a and c) and luminescence (b and d) spectra of complex **2** in aqueous buffer solution (pH=7) upon the addition of  $\text{CO}_3^{2-}$  and  $\text{S}^{2-}$  ion respectively.

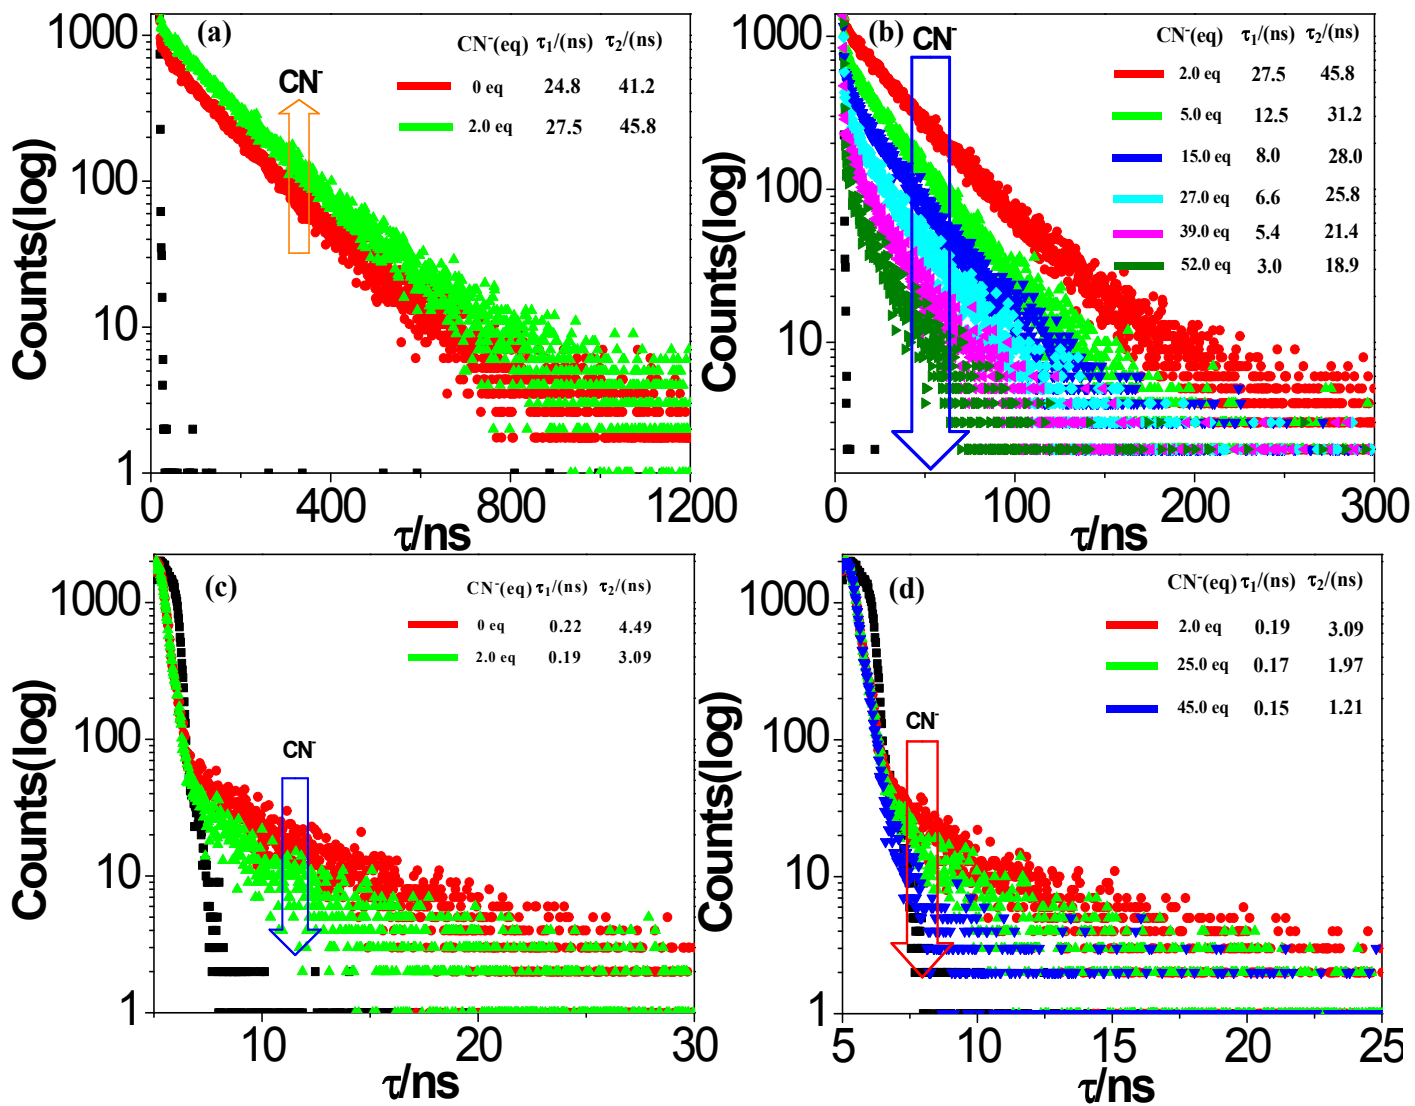

**Fig. S28** Changes in the time-resolved luminescence decays for **1** (a and b) with incremental addition of  $CN^-$  (0-50 equiv) and for **2** (c and d) with  $CN^-$  (0-45 equiv) in pure aqueous medium. Insets show the lifetime values.

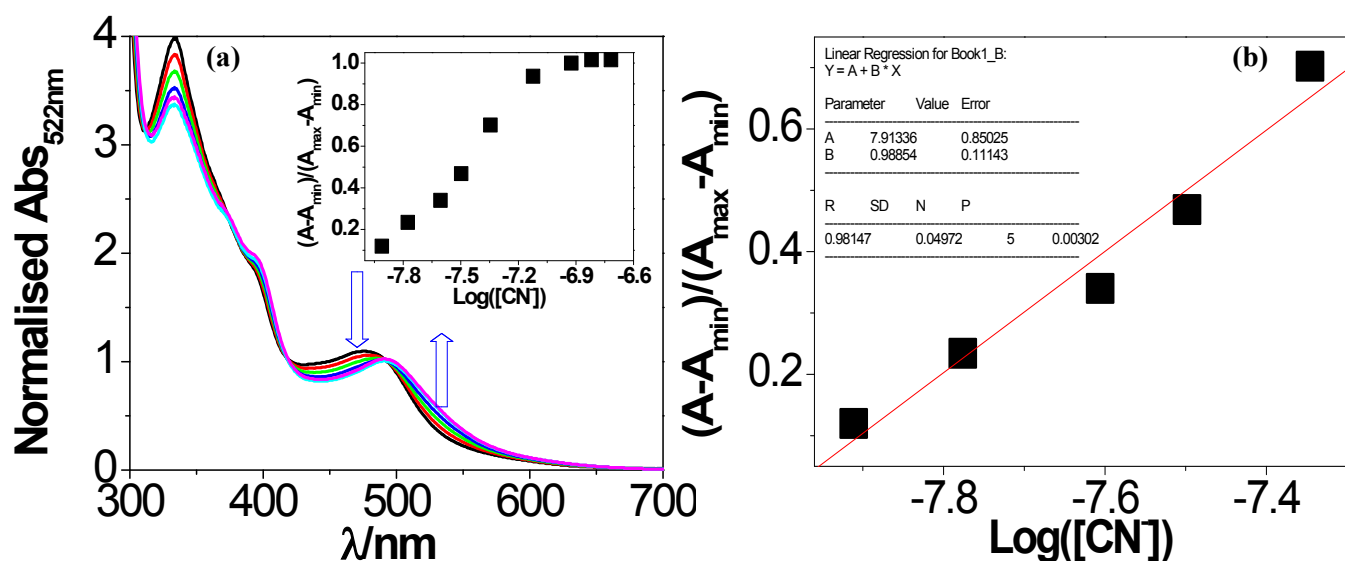

**Fig. S29** (a) Absorption spectral change during the titration of **1** with  $\text{CN}^-$  in water medium, inset shows the normalized absorbance between the minimum absorbance (free complex **1**) and the maximum absorbance. (b) A plot of  $(A-A_{\min})/(A_{\max}-A_{\min})$  vs  $\text{Log}([\text{CN}^-])$ , the calculated detection limit of receptor is  $1.12 \times 10^{-8}$  M.

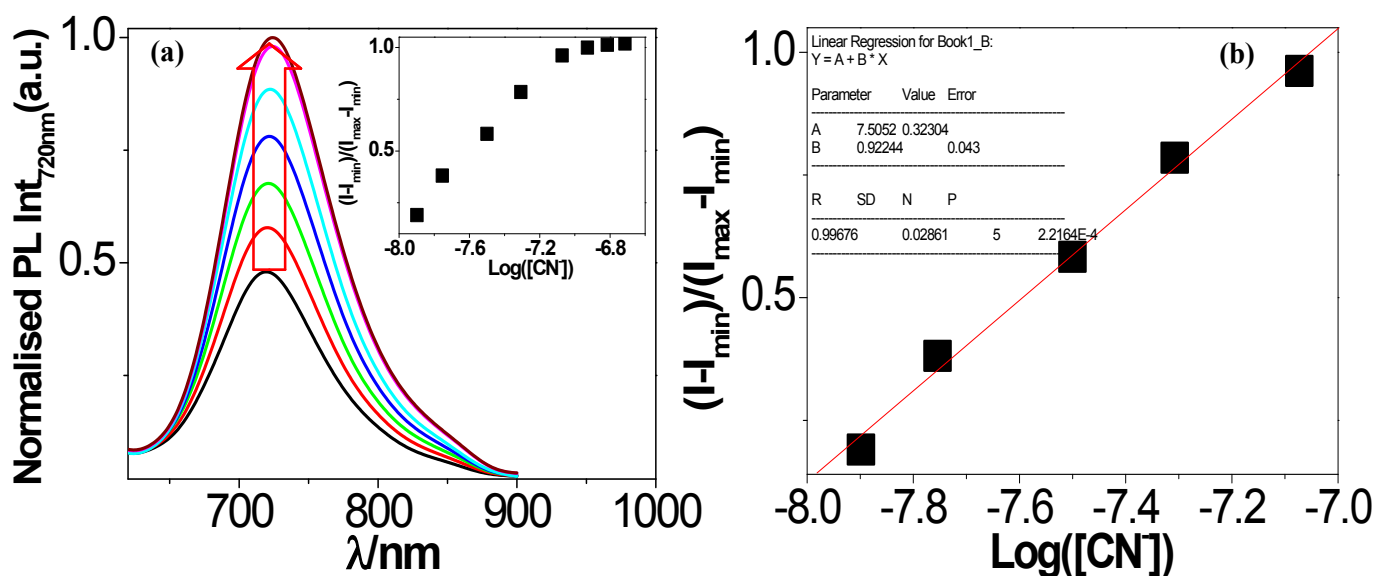

**Fig. S30** (a) Fluorescence spectral change during the titration of **1** with  $\text{CN}^-$  in water medium, inset shows the normalized intensity between the minimum intensity (free complex **1**) and the maximum intensity. (b) A plot of  $(I-I_{\min})/(I_{\max}-I_{\min})$  vs  $\text{Log}([\text{CN}^-])$ , the calculated detection limit of receptor is  $1.03 \times 10^{-8}$  M.

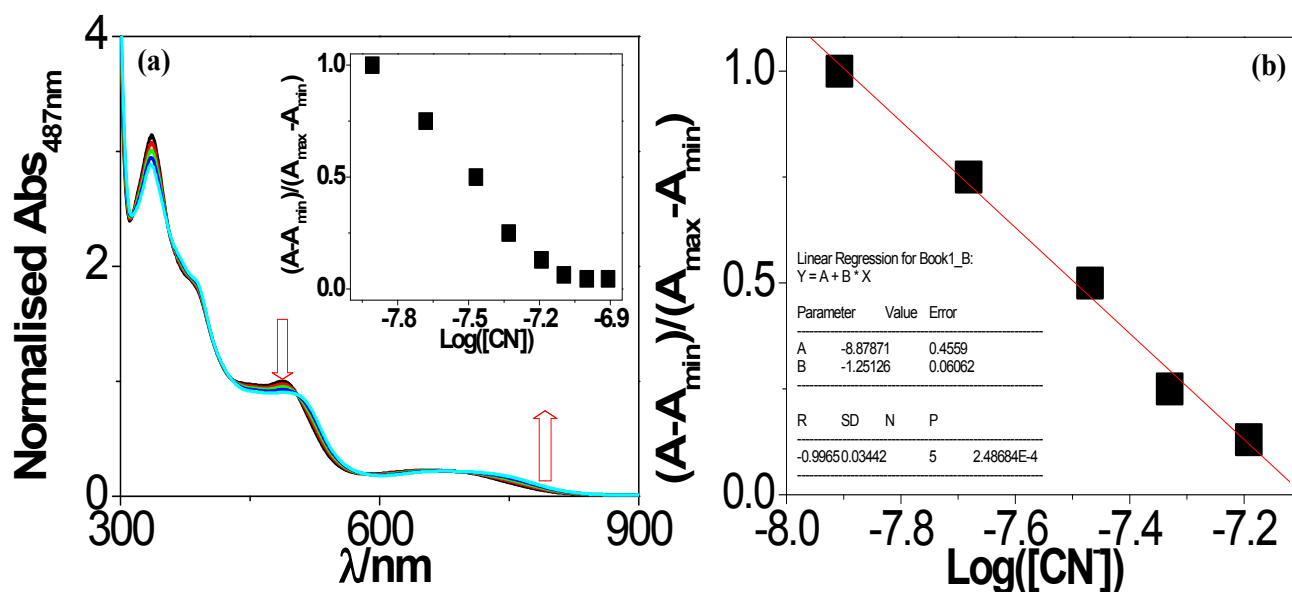

**Fig. S31** (a) Absorption spectral change during the titration of **2** with  $\text{CN}^-$  in water medium, inset shows the normalized absorbance between the minimum absorbance (free complex **2**) and the maximum absorbance. (b) A plot of  $(A-A_{\min})/(A_{\max}-A_{\min})$  vs  $\text{Log}([\text{CN}^-])$ , the calculated detection limit of receptor is  $1.10 \times 10^{-8}$  M.

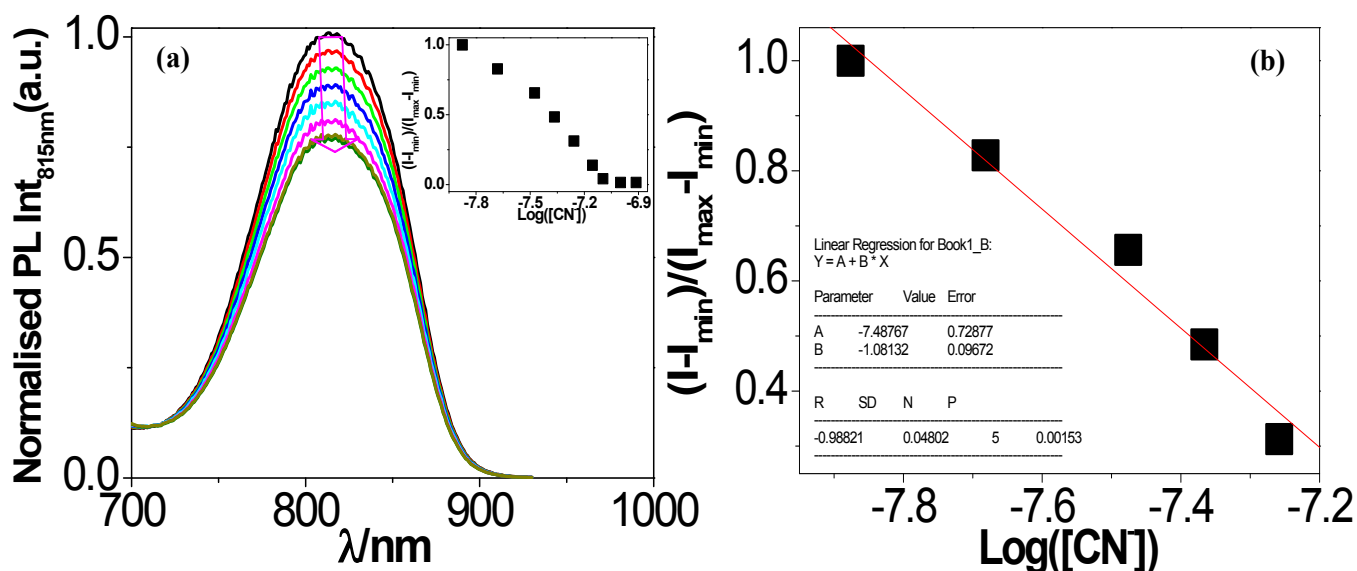

**Fig. S32** (a) Fluorescence spectral change during the titration of **2** with  $\text{CN}^-$  in water medium, inset shows the normalized intensity between the minimum intensity (free complex **2**) and the maximum intensity. (b) A plot of  $(I-I_{\min})/(I_{\max}-I_{\min})$  vs  $\text{Log}([\text{CN}^-])$ , the calculated detection limit of receptor is  $1.24 \times 10^{-8}$  M.



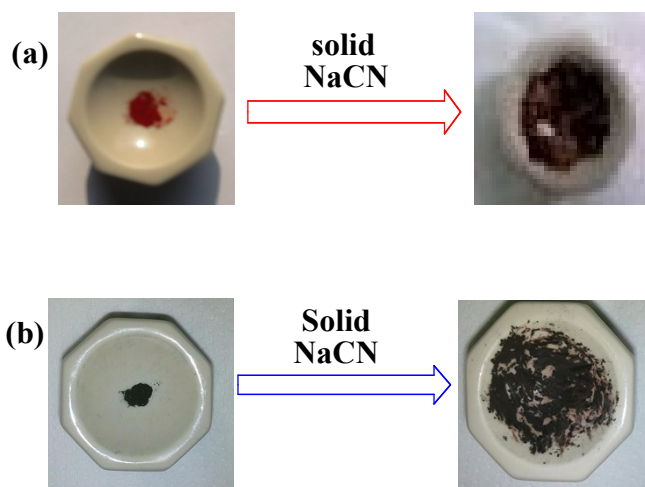

**Fig. S33** Visible color changes that occur when receptor **1** and **2** (a and b respectively) are grinded mechanochemically with NaCN in solid state.

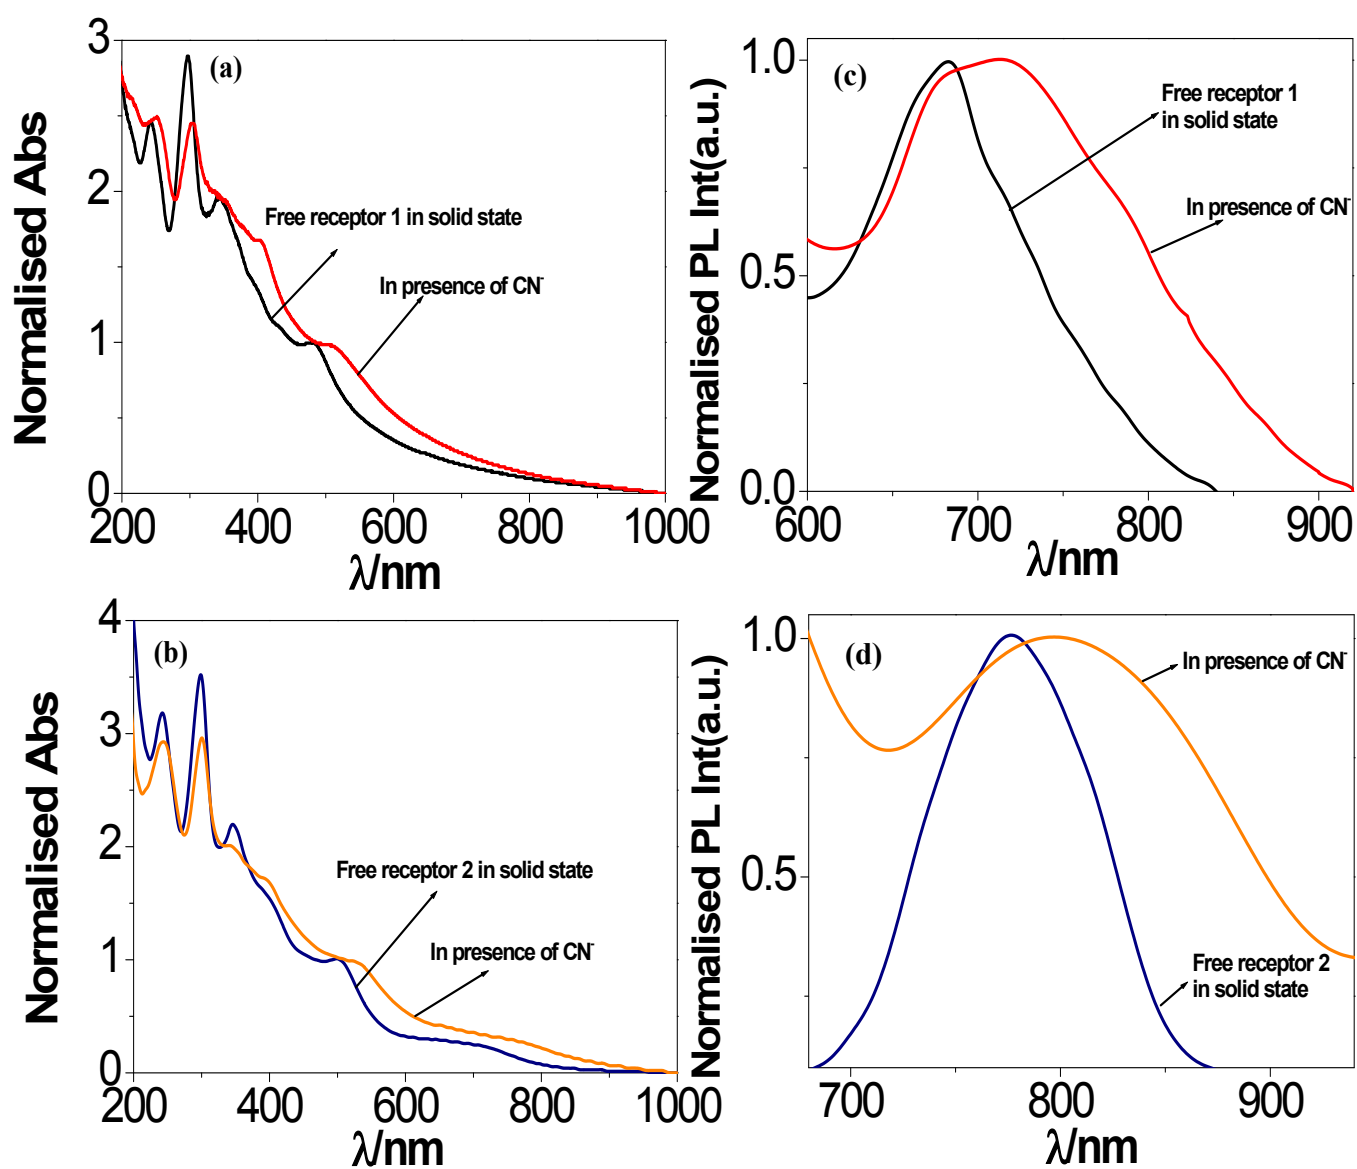

**Fig. S34** Changes in UV-vis absorption (a and b) and luminescence (c and d) spectra of **1** and **2**, respectively in solid state upon grinding with  $CN^-$  ion.

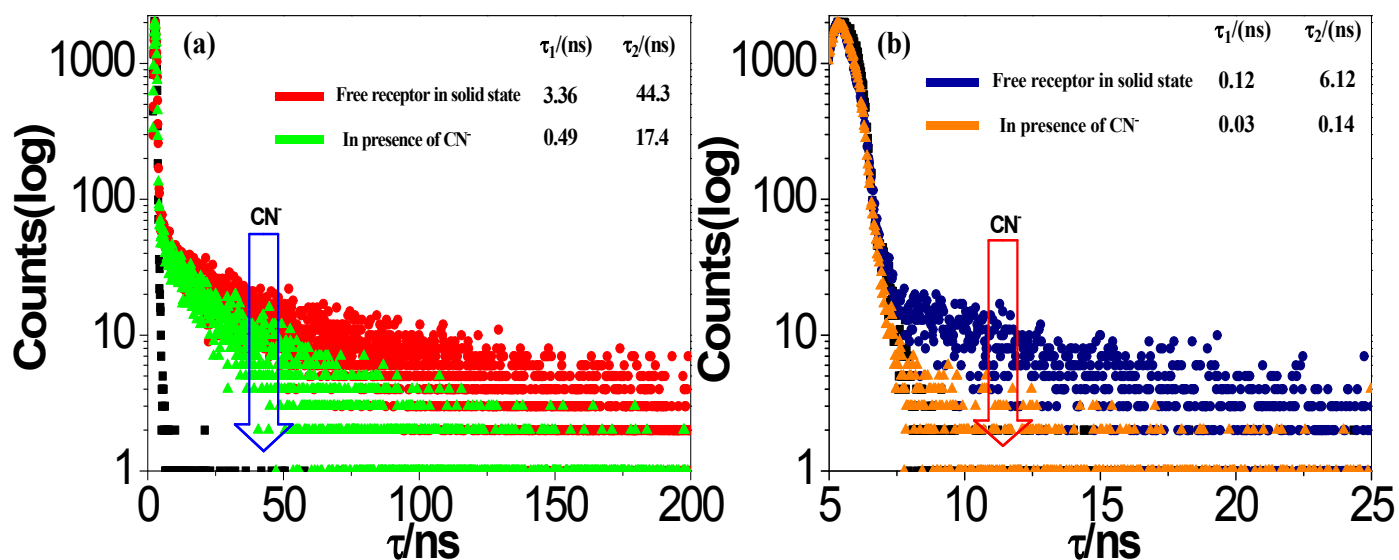

**Fig. S35** Changes in the time-resolved luminescence decays for **1** (a) and **2** (b) in solid state when grinded with  $\text{CN}^-$ . Insets show the lifetime values.

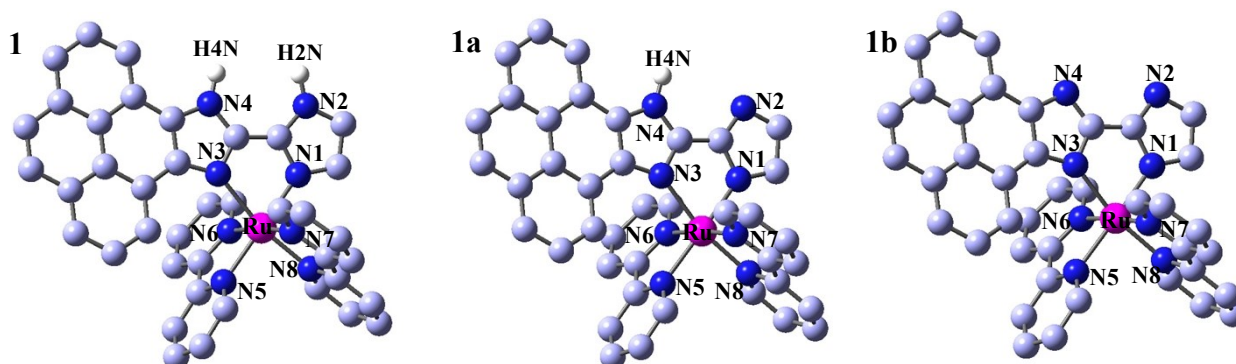

**Fig. S36** Optimised geometries and labelling scheme for  $[(\text{bpy})_2\text{Ru}(\text{Py-BiimzH}_2)]^{2+}$  (**1**),  $[(\text{bpy})_2\text{Ru}(\text{Py-BiimzH})]^+$  (**1a**) and  $[(\text{bpy})_2\text{Ru}(\text{Py-Biimz})]^0$  (**1b**) in solution phase (using 6-31G(d) and SDD basis sets).

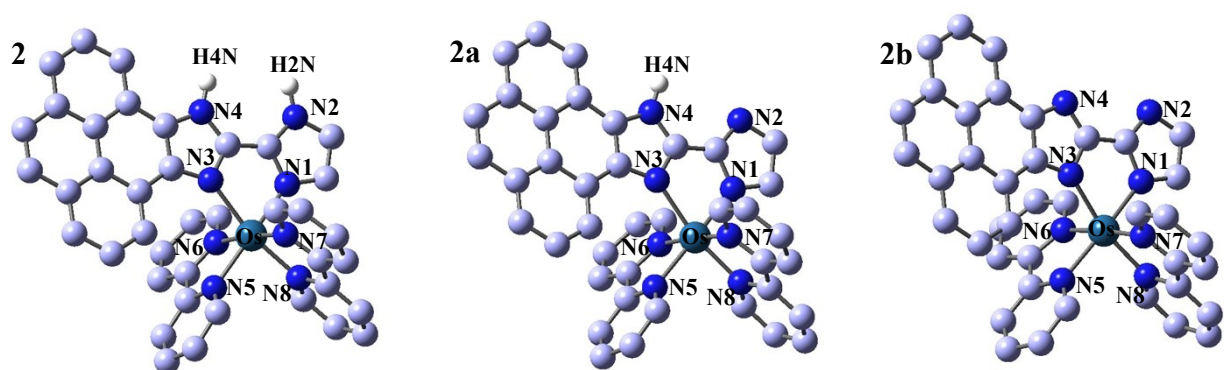

**Fig. S37** Optimised geometries and labelling scheme for  $[(\text{bpy})_2\text{Os}(\text{Py-BiimzH}_2)]^{2+}$  (**2**),  $[(\text{bpy})_2\text{Os}(\text{Py-BiimzH})]^+$  (**2a**) and  $[(\text{bpy})_2\text{Os}(\text{Py-Biimz})]^0$  (**2b**) in solution phase (using 6-31G(d) and SDD basis sets).

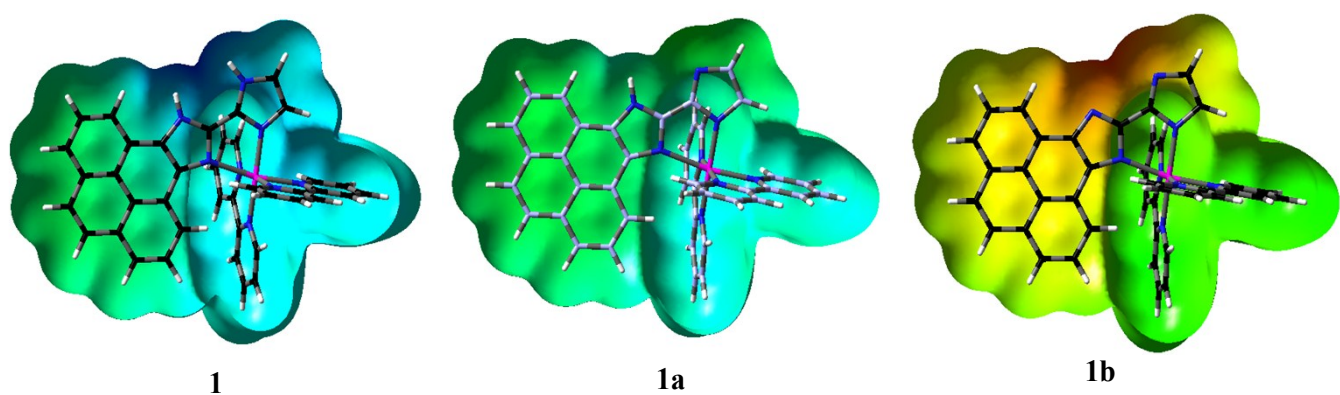

**Fig. S38** Molecular electrostatic potential mapped on the isodensity surface in the ground state for  $[(\text{bpy})_2\text{Ru}(\text{Py-BiimzH}_2)]^{2+}$  (**1**),  $[(\text{bpy})_2\text{Ru}(\text{Py-BiimzH})]^+$  (**1a**) and  $[(\text{bpy})_2\text{Ru}(\text{Py-Biimz})]^0$  (**1b**) in the range from  $-4.000\text{e-}2$  (red) to  $+4.000\text{e-}2$  (blue).

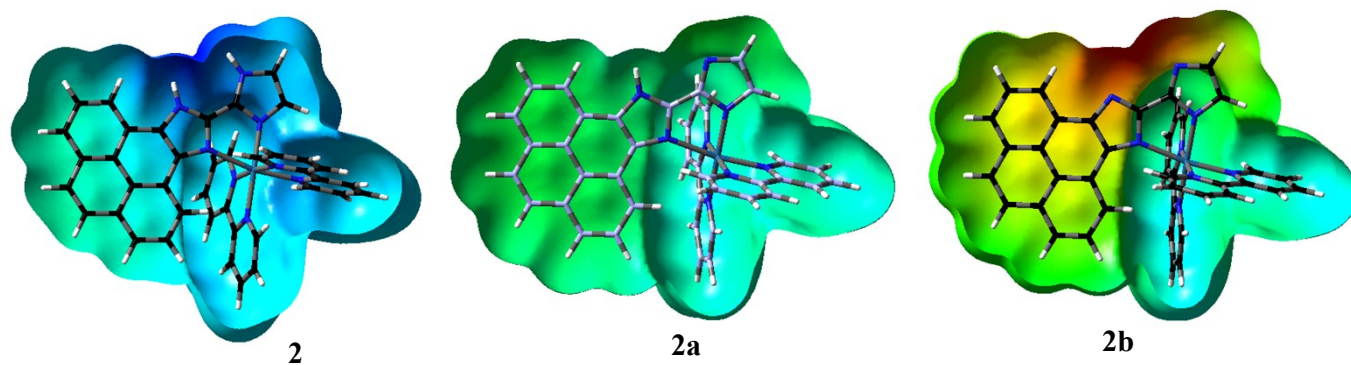

**Fig. S39** Molecular electrostatic potential mapped on the isodensity surface in the ground state for  $[(\text{bpy})_2\text{Os}(\text{Py-BiimzH}_2)]^{2+}$  (**2**),  $[(\text{bpy})_2\text{Os}(\text{Py-BiimzH})]^+$  (**2a**) and  $[(\text{bpy})_2\text{Os}(\text{Py-Biimz})]^0$  (**2b**) in the range from  $-4.000\text{e-}2$  (red) to  $+4.000\text{e-}2$  (blue) .

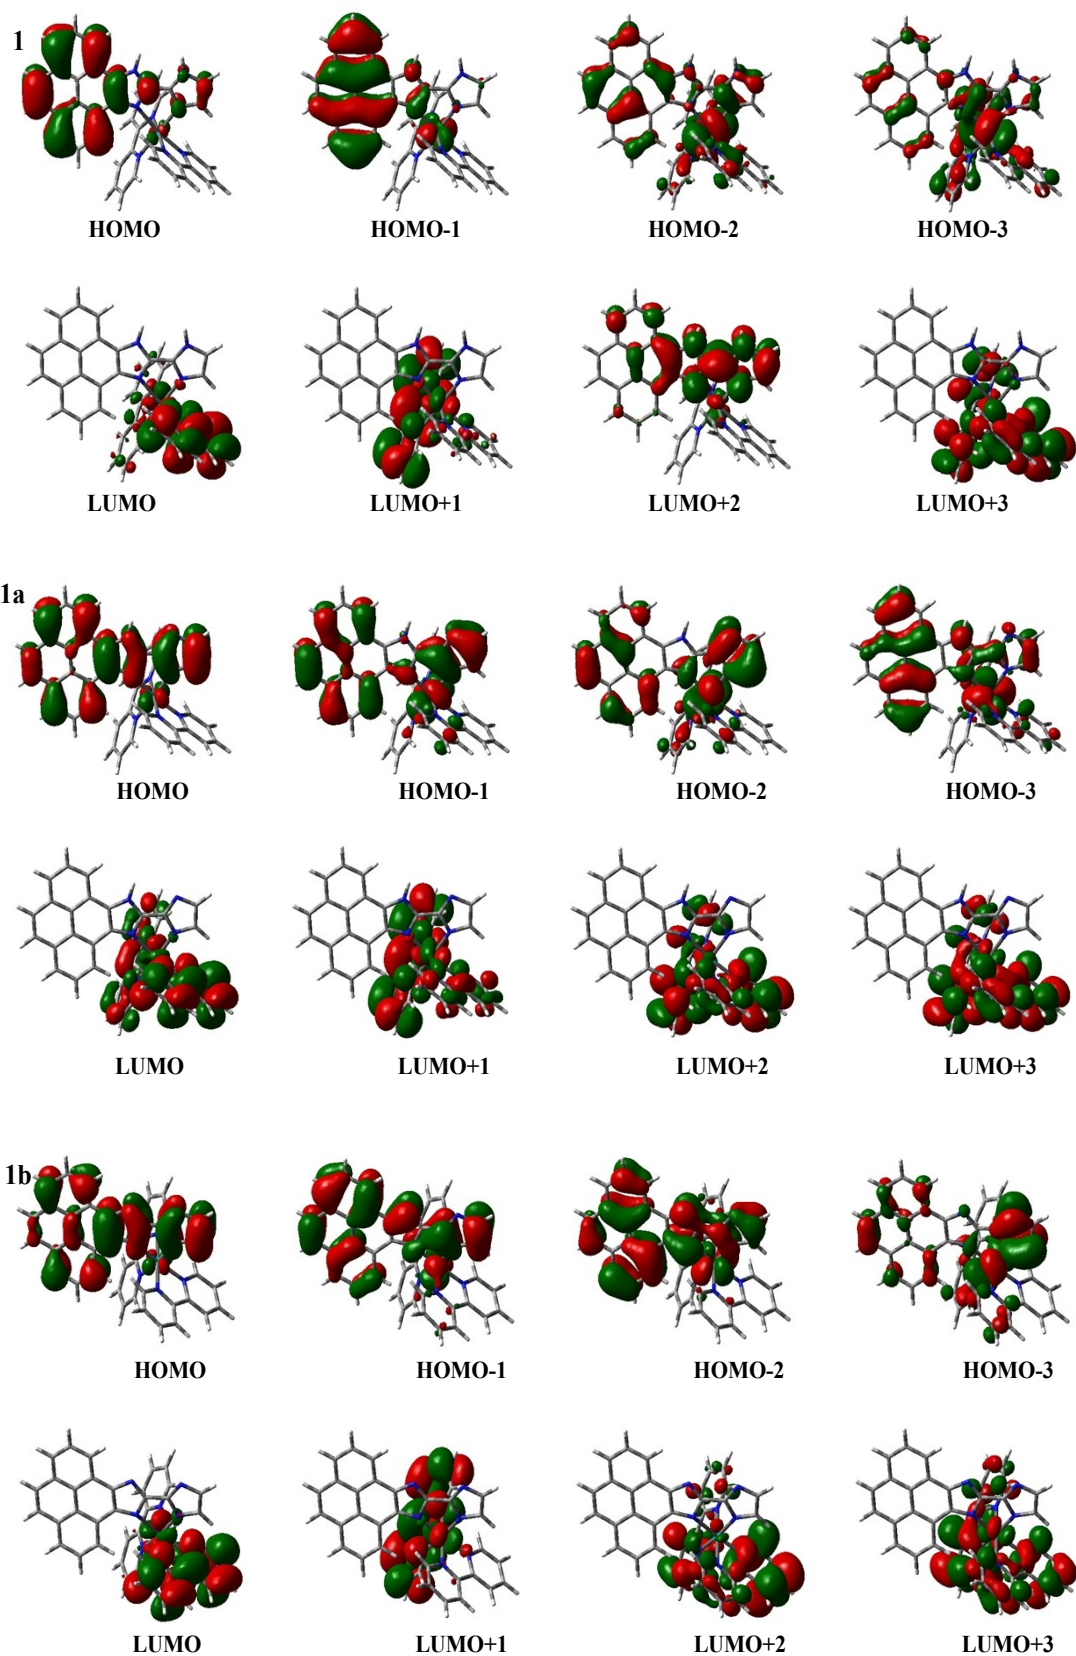

**Fig. S40** Schematic drawings of the selective frontier molecular orbitals for  $[(\text{bpy})_2\text{Ru}(\text{Py-BiimzH}_2)]^{2+}$  (**1**),  $[(\text{bpy})_2\text{Ru}(\text{Py-BiimzH})]^+$  (**1a**) and  $[(\text{bpy})_2\text{Ru}(\text{Py-Biimz})]^0$  (**1b**) in solution phase (using 6-31G(d) and SDD basis sets).

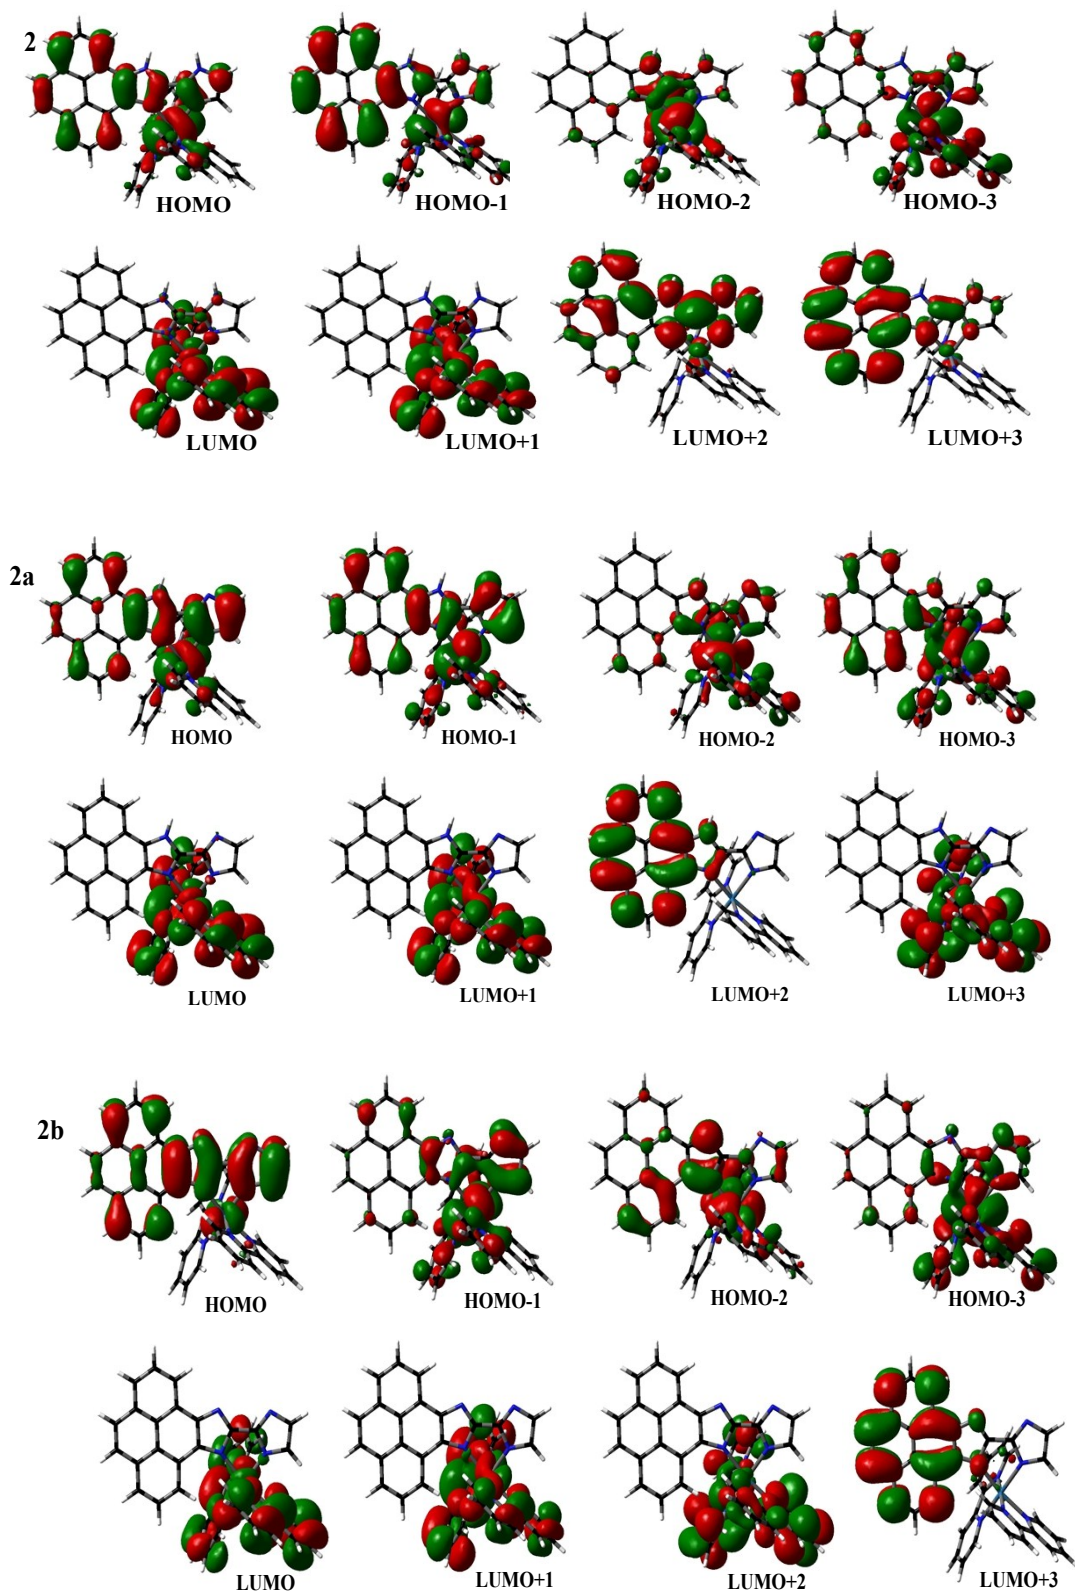

**Fig. S41** Schematic drawings of the selective frontier molecular orbitals for  $[(\text{bpy})_2\text{Os}(\text{Py-BiimzH}_2)]^{2+}$  (**1**),  $[(\text{bpy})_2\text{Os}(\text{Py-BiimzH})]^+$  (**1a**) and  $[(\text{bpy})_2\text{Os}(\text{Py-Biimz})]^0$  (**1b**) in solution phase (using -31G(d) and SDD basis sets).

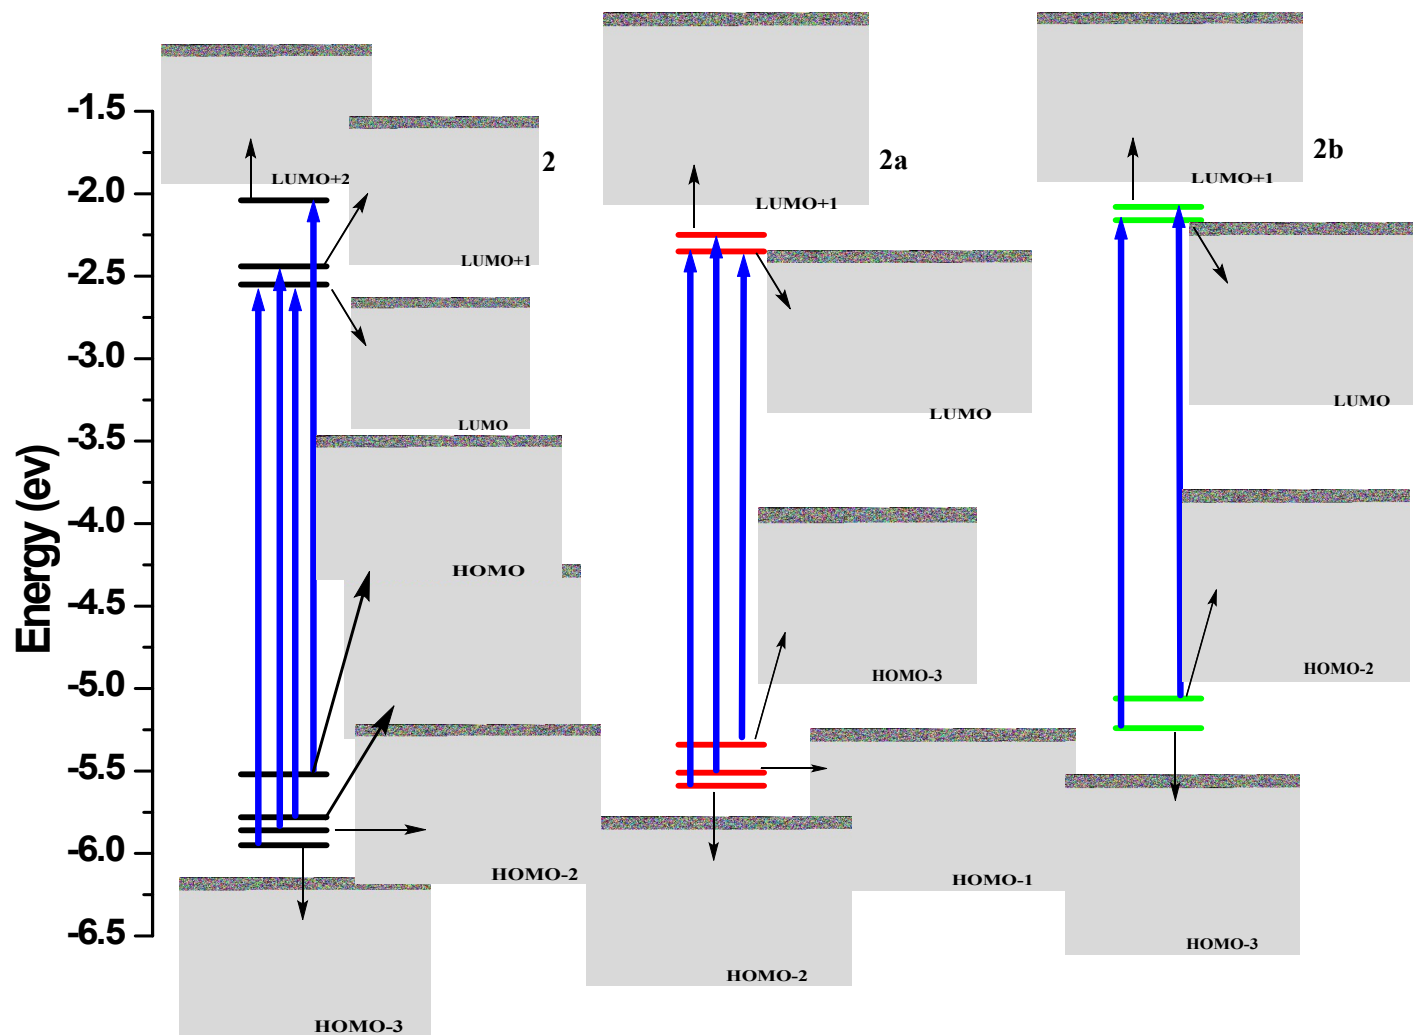

**Fig. S42** Energy level diagrams depicting the dominant transitions that comprise the lowest-energy absorption band for  $[(bpy)_2Os(Py-BiimzH_2)]^{2+}$  (**2**),  $[(bpy)_2Os(Py-BiimzH)]^+$  (**2a**) and  $[(bpy)_2Os(Py-Biimz)]$  (**2b**) in acetonitrile (using 6-31G(d) and SDD basis sets).



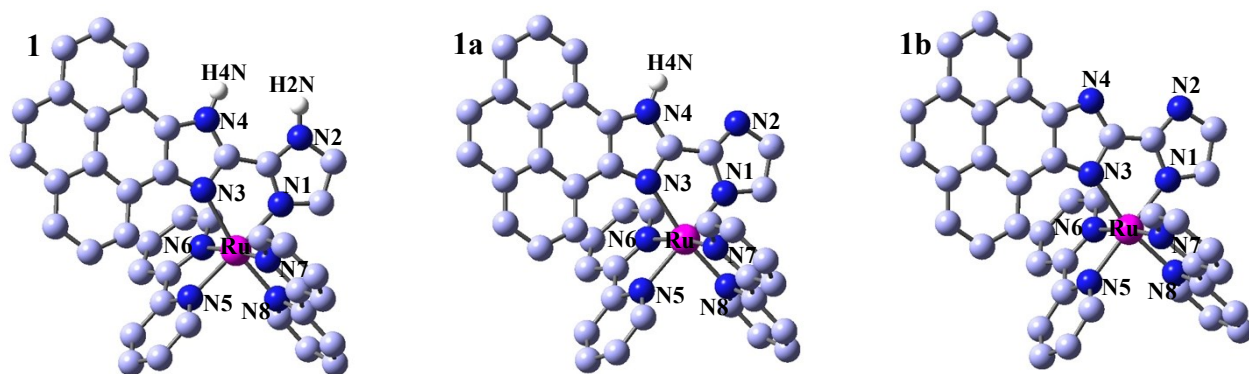

**Fig. S43** Optimised geometries and labelling scheme for  $[(\text{bpy})_2\text{Ru}(\text{Py-BiimzH}_2)]^{2+}$  (**1**),  $[(\text{bpy})_2\text{Ru}(\text{Py-BiimzH})]^+$  (**1a**) and  $[(\text{bpy})_2\text{Ru}(\text{Py-Biimz})]^0$  (**1b**) in triplet excited state (using 6-31G(d) and SDD basis sets).

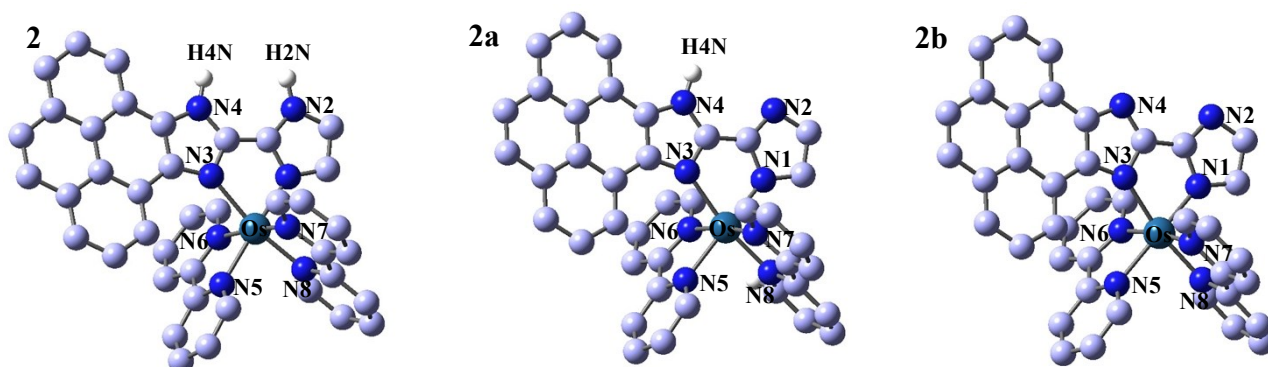

**Fig. S44** Optimised geometries and labelling scheme for  $[(\text{bpy})_2\text{Os}(\text{Py-BiimzH}_2)]^{2+}$  (**2**),  $[(\text{bpy})_2\text{Os}(\text{Py-BiimzH})]^+$  (**2a**) and  $[(\text{bpy})_2\text{Os}(\text{Py-Biimz})]^0$  (**2b**) in triplet excited state (using 6-31G(d) and SDD basis sets).

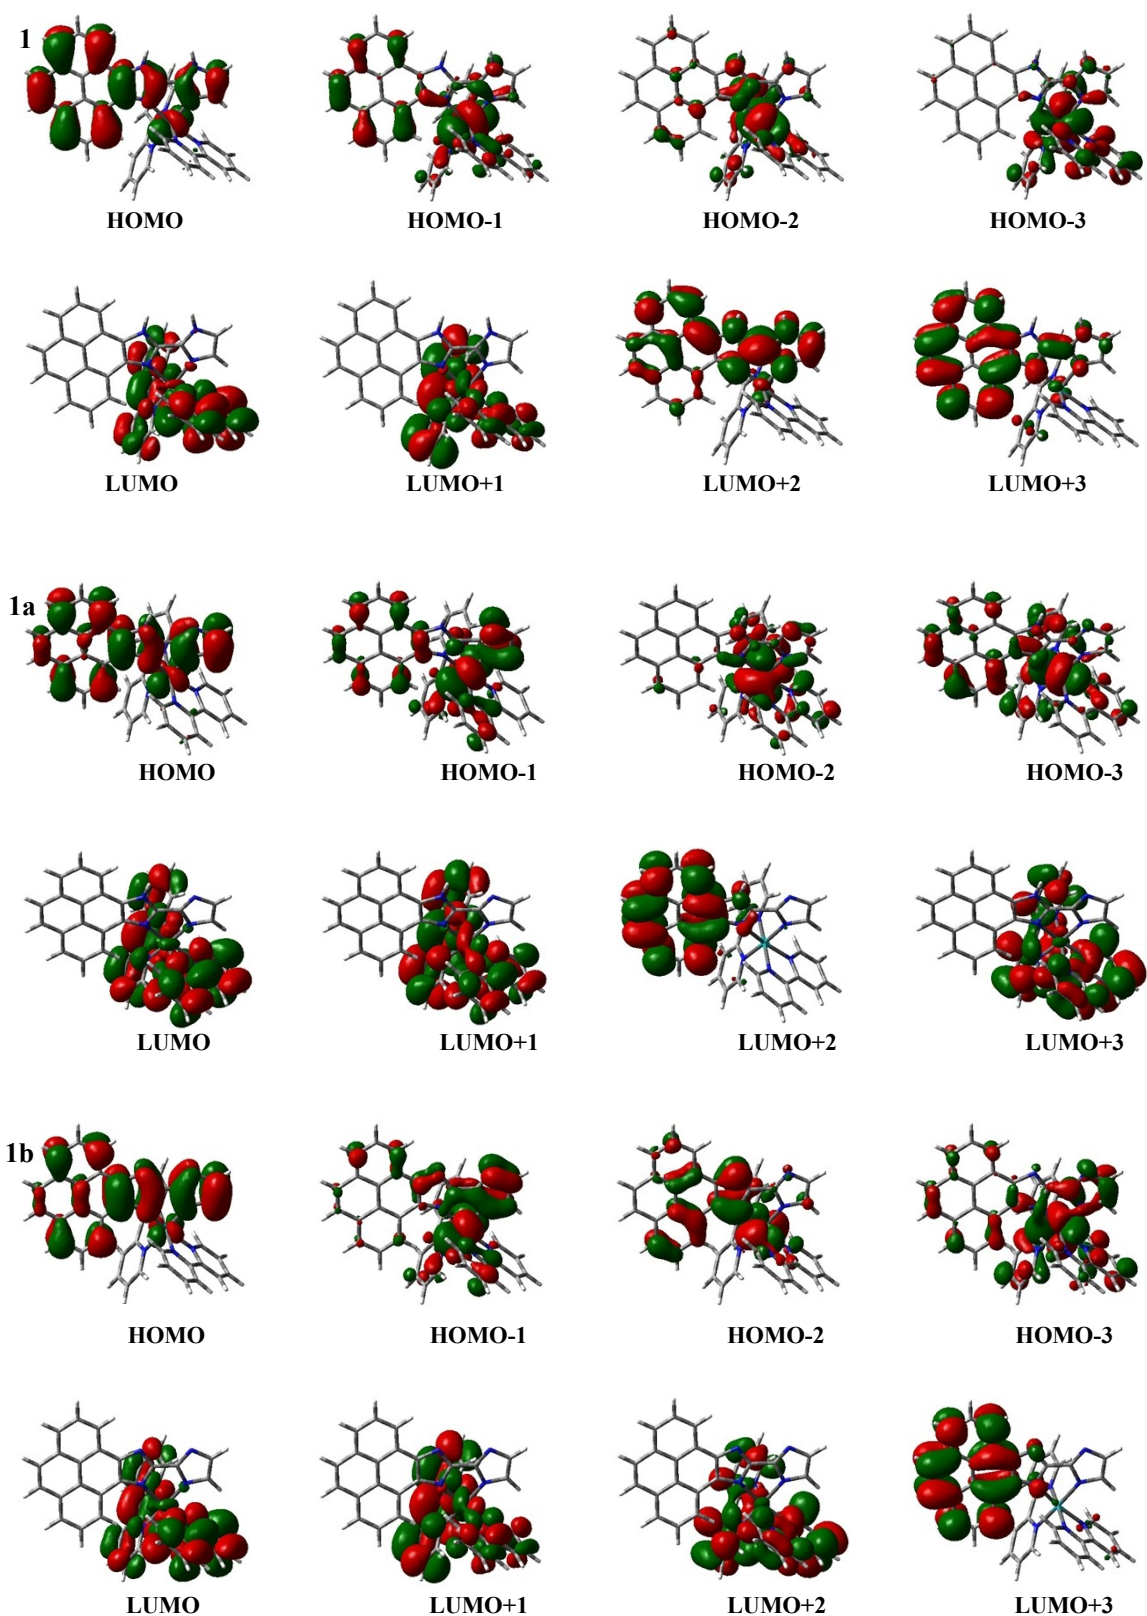

**Fig. S45** Schematic drawings of the selective frontier molecular orbitals for  $[(bpy)_2Ru(Py-BiimzH_2)]^{2+}$  (**1**),  $[(bpy)_2Ru(Py-BiimzH)]^+$  (**1a**) and  $[(bpy)_2Ru(Py-Biimz)]^0$  (**1b**) in triplet excited state (using 6-31G(d) and SDD basis sets).

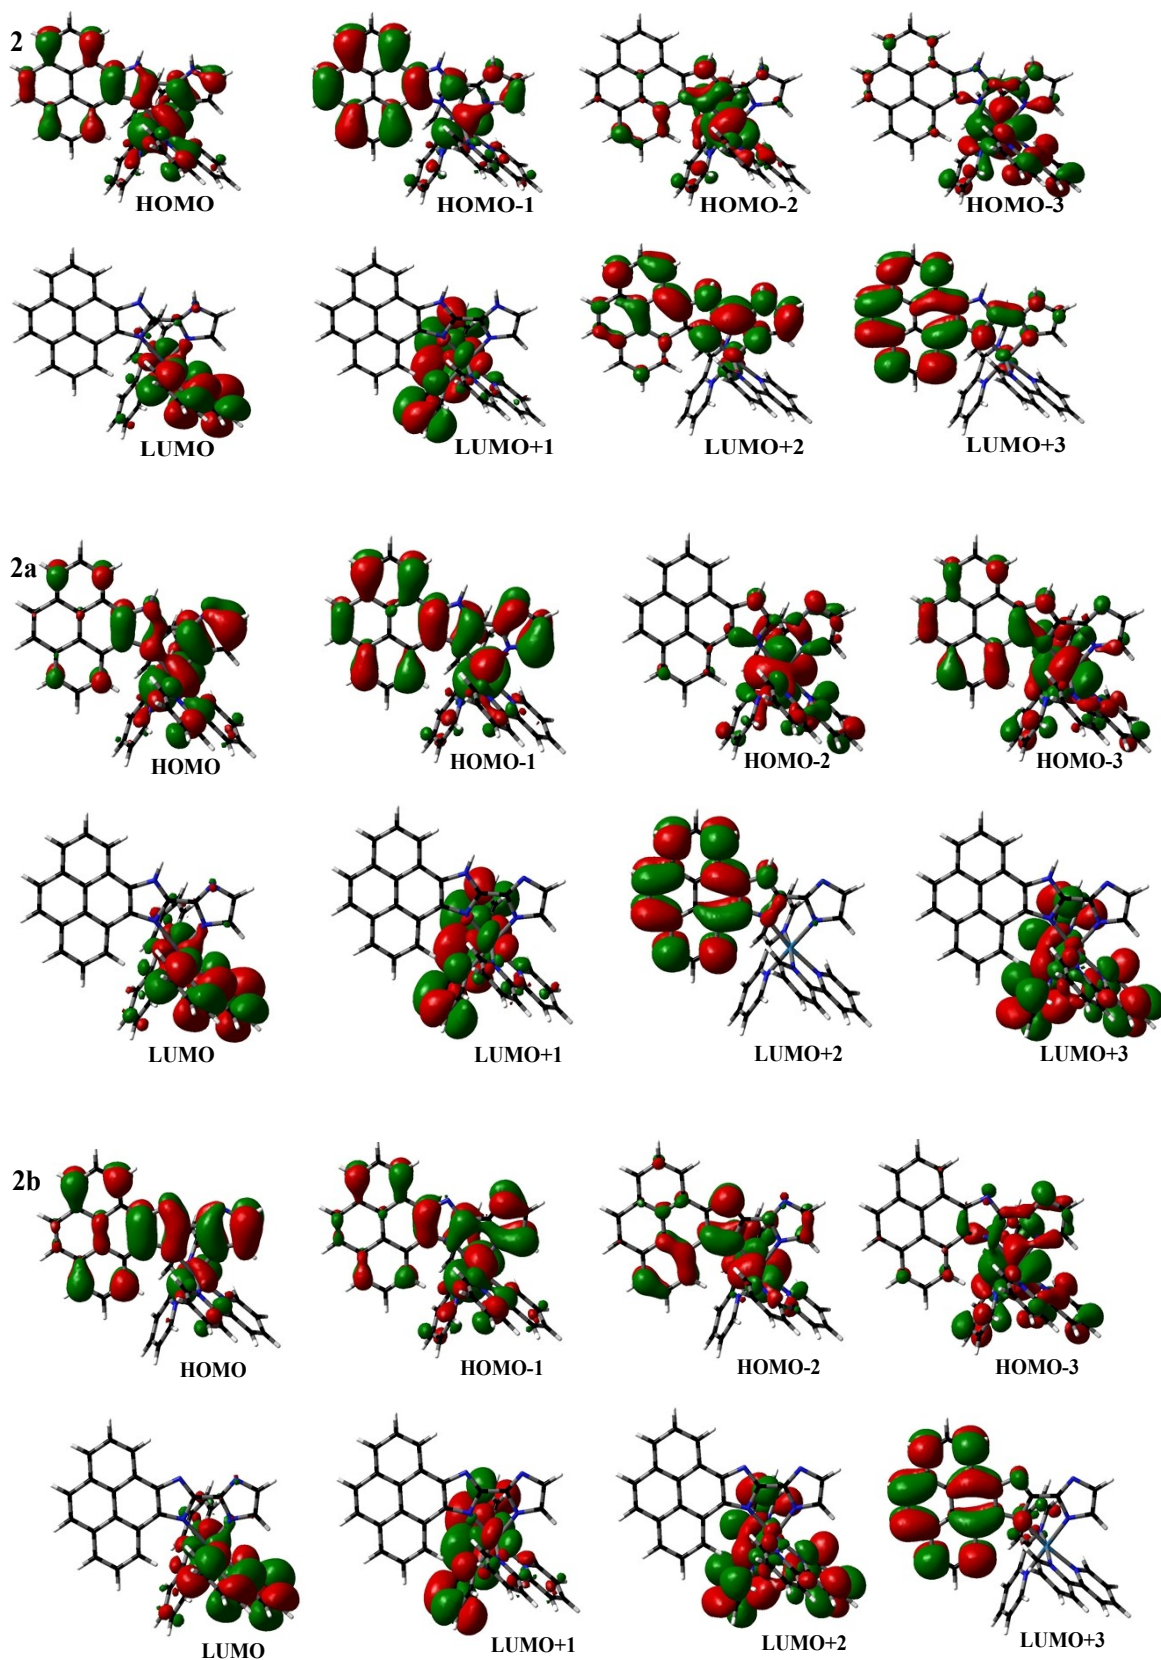

**Fig. S46** Schematic drawings of the selective frontier molecular orbitals for  $[(bpy)_2Os(Py-BiimzH_2)]^{2+}$  (**2**),  $[(bpy)_2Os(Py-BiimzH)]^+$  (**2a**) and  $[(bpy)_2Os(Py-Biimz)]^0$  (**2b**) in triplet excited state (using 6-31G(d) and SDD basis sets).

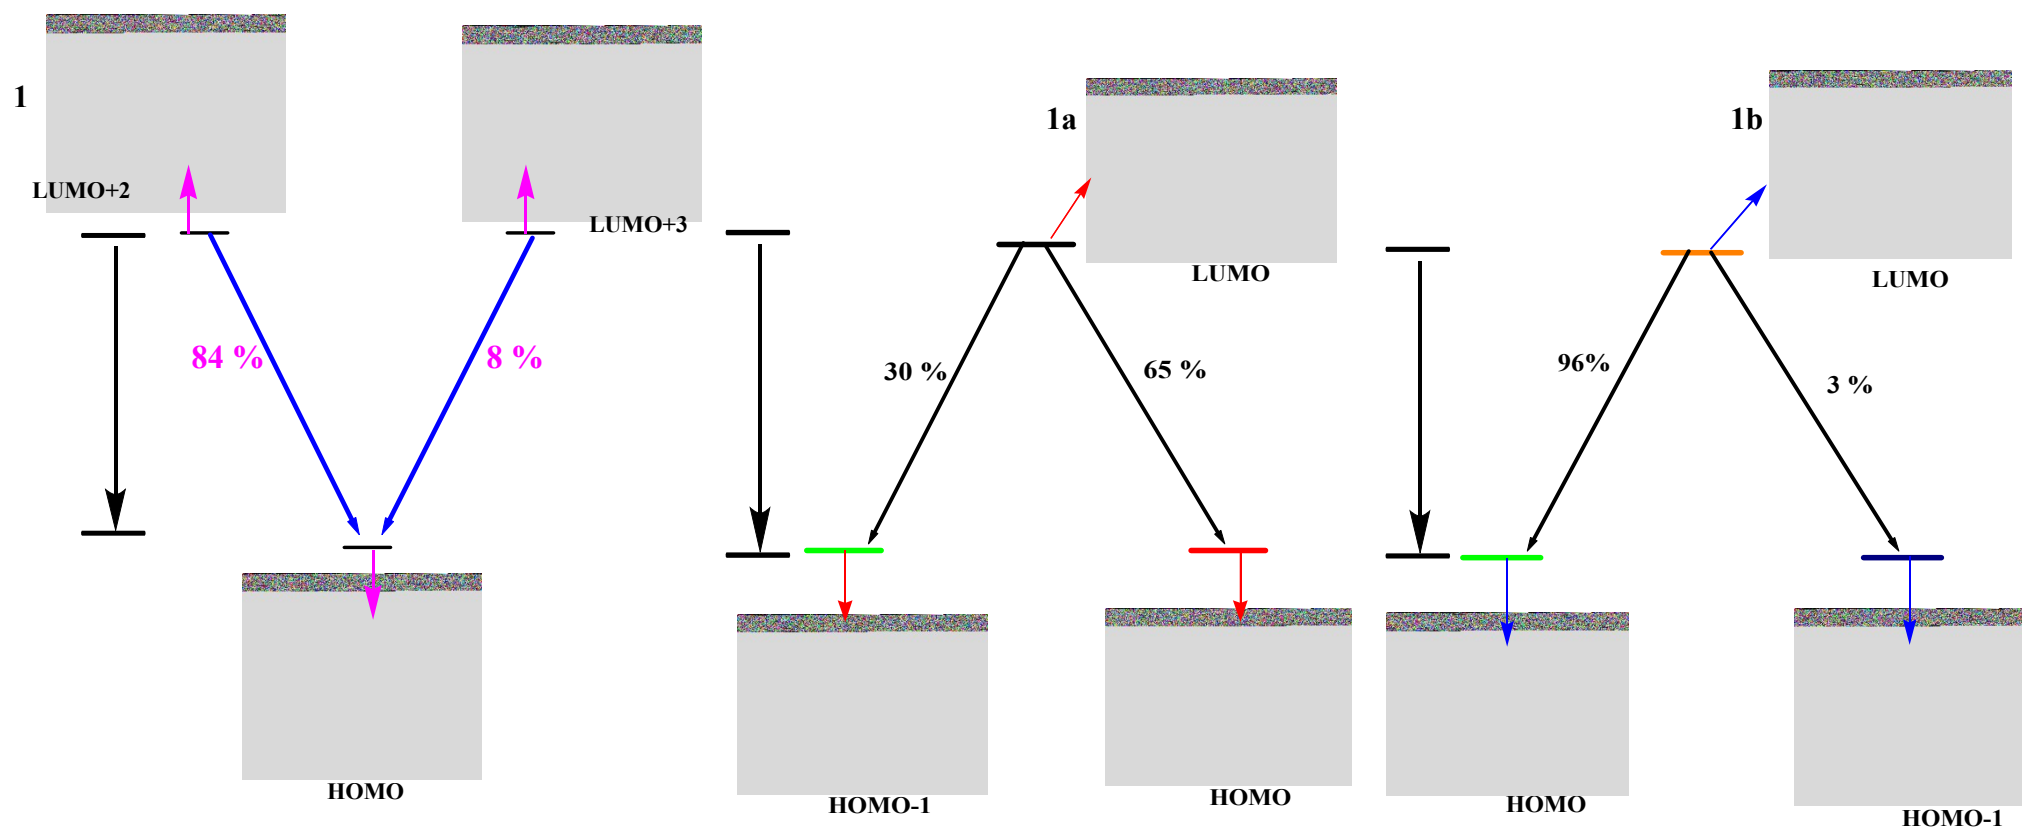

**Fig. S47** Calculated single electron transitions for the emissions of  $T_1$  states for  $[(bpy)_2Ru(Py-BiimzH_2)]^{2+}$  (**1**),  $[(bpy)_2Ru(Py-BiimzH)]^+$  (**1a**) and  $[(bpy)_2Ru(Py-Biimz)]^0$  (**1b**) (using 6-31G(d) and SDD basis sets).

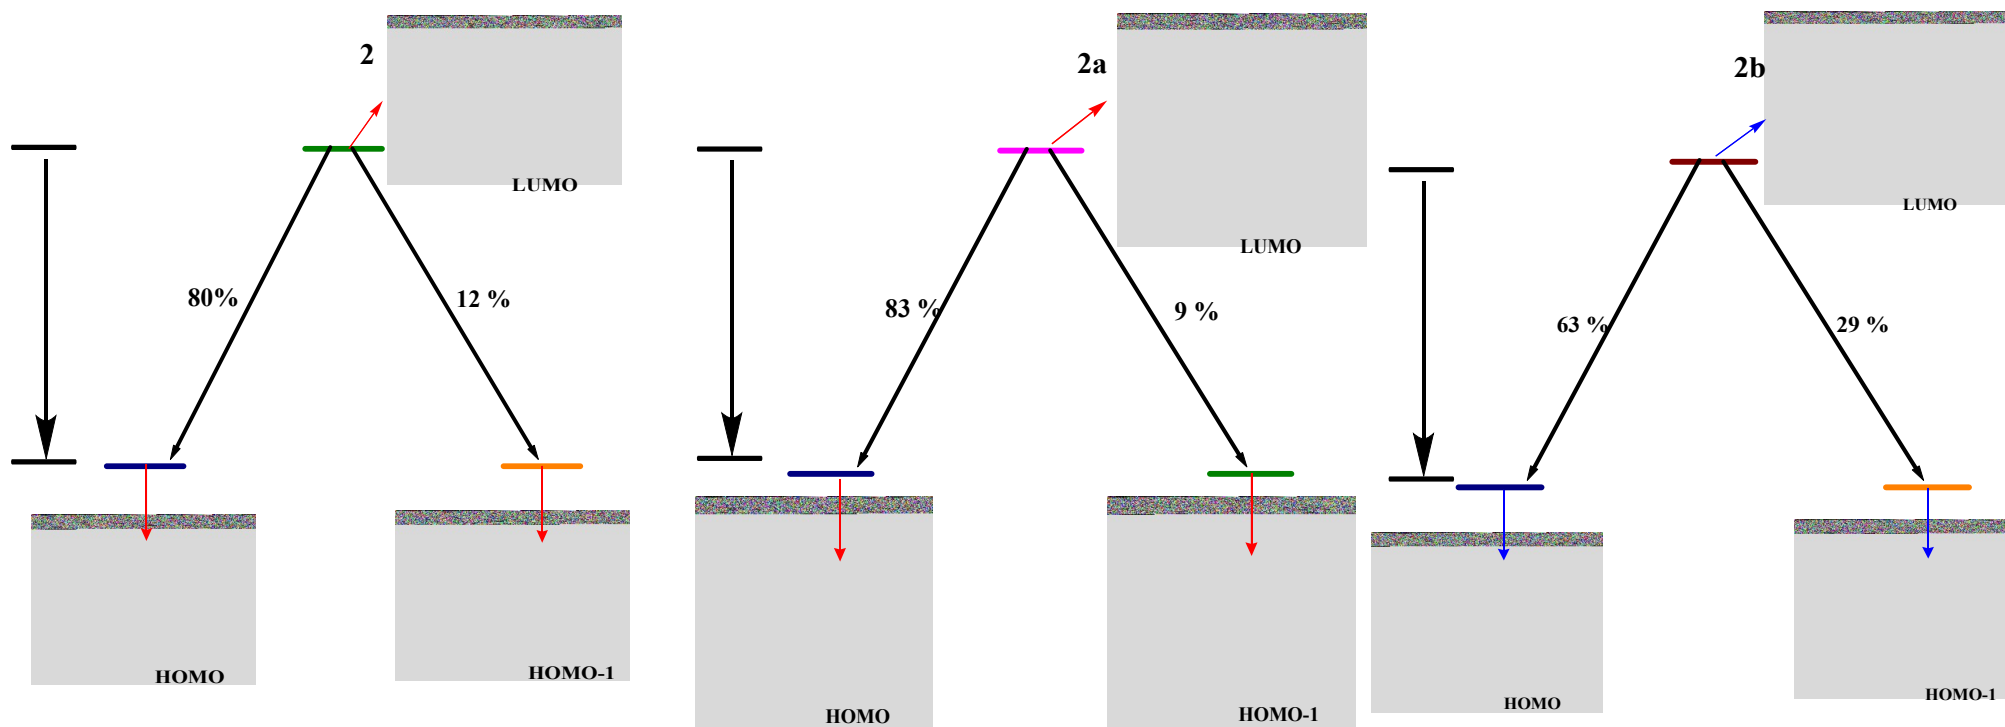

**Fig. S48** Calculated single electron transitions for the emissions of  $T_1$  states for  $[(bpy)_2Os(Py-BiimzH_2)]^{2+}$  (**2**),  $[(bpy)_2Os(Py-BiimzH)]^+$  (**2a**) and  $[(bpy)_2Os(Py-Biimz)]^0$  (**2b**) (using 6-31G(d) and SDD basis sets).

## References

- (S1) (a) K. Nakamaru, *Bull. Chem. Soc. Jpn.* 1982, **55**, 1639 and references cited therein; (b) J. N. Demas and G. A. Crosby, *J. Am. Chem. Soc.* 1971, **93**, 2841; (c) J. van Houten and R. J. Watts, *J. Am. Chem. Soc.* 1976, **98**, 4853.
- (S2) Schneider, H.-J.; Yatsimirsky, A. *Principles and Methods in Supramolecular Chemistry*; John Wiley & Sons: England, 2000, 142.
- (S3) SAINT (version 6.02), SADABS (version 2.03); Bruker AXS Inc.: Madison, WI, 2002.
- (S4) SHELXTL, (version 6.10); Bruker AXS Inc.: Madison, WI, 2002.
- (S5) Sheldrick, G. M. SHELXL-97, *Program for the Refinement of crystal Structures*; University of Göttingen: Göttingen, Germany, 1997.
- (S6) PLATON; Spek, A. L. *J. Appl. Cryst.* 2003, **36**, 7-13.
- (S7) M. J. Frisch, G. W. Trucks, H. B. Schlegel, G. E. Scuseria, M. A. Robb, J. R. Cheeseman, G. Scalmani, V. Barone, B. Mennucci, G. A. Petersson, H. Nakatsuji, M. Caricato, X. Li, H. P. Hratchian, A. F. Izmaylov, J. Bloino, G. Zheng, J. L. Sonnenberg, M. Hada, M. Ehara, K. Toyota, R. Fukuda, J. Hasegawa, M. Ishida, T. Nakajima, Y. Honda, O. Kitao, H. Nakai, T. Vreven, J. A. Montgomery, J. E. Jr.; Peralta, F. Ogliaro, M. Bearpark, J. J. Heyd, E. Brothers, K. N. Kudin, V. N. Staroverov, R. Kobayashi, J. Normand, K. Raghavachari, A. Rendell, J. C. Burant, S. S. Iyengar, J. Tomasi, M. Cossi, N. Rega, J. M. Millam, M. Klene, J. E. Knox, J. B. Cross, V. Bakken, C. Adamo, J. Jaramillo, R. Gomperts, R. E. Stratmann, O. Yazyev, A. J. Austin, R. Cammi, C. Pomelli, J. W. Ochterski, R. L. Martin, K. Morokuma, V. G. Zakrzewski, G. A. Voth, P. Salvador, J. J. Dannenberg, S. Dapprich, A. D. Daniels, Ö. Farkas, J. B. Foresman, J. V. Ortiz, J. Cioslowski and D. J. Fox, *Gaussian 09*, revision A.02; Gaussian Inc.: Wallingford, CT, 2009.
- (S8) A. D. Becke, *J. Chem. Phys.*, 1993, **98**, 5648-5652.
- (S9) C. T. Lee, W. T. Yang and R. G. Parr, *Phys. Rev. B*, 1988, **37**, 785-789.
- (S10) (a) D. Andrae, U. Haeussermann, M. Dolg, H. Stoll and H. Preuss, *Theor. Chim. Acta.* 1990, **77**, 123. (b) P. Fuentealba, H. Preuss, H. Stoll and L. V. Szentpaly, *Chem. Phys. Lett.* 1989, **89**, 418.
- (S11) P. J. Hay and W. R. Wadt, *J. Chem. Phys.* 1985, **82**, 299-310.
- (S12) M. E. Casida, C. Jamorski, K. C. Casida and D. R. Salahub, *J. Chem. Phys.* 1998, **108**, 4439-4449.
- (S13) R. E. Stratmann, G. E. Scuseria and M. J. Frisch, *J. Chem. Phys.* 1998, **109**, 8218-8224.

- (S14) V. A. Walters, C. M. Hadad, Y. Thiel, S. D. Colson, K. B. Wiberg, P. M. Johnson and J. B. Foresman, *J. Am. Chem. Soc.* 1991, **113**, 4782-4791.
- (S15) (a) J. Tomasi, B. Mennucci and R. Cammi, *Chem. Rev.* 2005, **105**, 2999–3094. (b) M. Cossi, G. Scalmani, N. Rega and V. Barone, *J. Chem. Phys.* 2002, **117**, 43–54.
- (S16) M. Caricato, B. Mennucci, J. Tomasi, F. Ingrosso, R. Cammi, S. Corni and G. Scalmani, *J. Chem. Phys.* 2006, **124**, 124520-124533.
- (S17) B. Mennucci, C. Cappelli, C. A. Guido, R. Cammi and J. Tomasi, *J. Phys. Chem. A* 2009, **113**, 3009-3020.
- (S18) R. H. Dennington, T. Keith and J. Millam, *Gauss View 3*; Semichem, Inc.: Shawnee Mission, KS, 2007.
- (S19) N. M. O Boyle, A. L. Tenderholt and K. M. Langner, *J. Comput. Chem.* 2008, **29**, 839-845.
